# Supplementary material for: Dual effect of the coordination field and sulphuric acid on the properties of a single-atom catalyst in the electrosynthesis of H2O2
Source: Royal Society of Chemistry journal article supplement (doi:10.1039/d1cp03189a), 2021-01-01
Supplement: d1cp03189a1.pdf [file d1cp03189a1.pdf]

## Dual Effect of Coordination Field and Sulphuric Acid on Property of Single-Atom Catalyst in the Electrosynthesis of H<sub>2</sub>O<sub>2</sub>

Jinkong Pan<sup>a</sup>, Qiaojun Fang<sup>a</sup>, Qian Xia<sup>b</sup>, Anfu Hu<sup>b</sup>, Fuli Sun<sup>a</sup>, Wei Zhang<sup>a</sup>, Yifan Yu<sup>a</sup>,  
Guilin Zhuang<sup>a\*</sup>, Jian Jiang<sup>b\*</sup>, Jianguo Wang<sup>a\*</sup>

<sup>a</sup>Institute of Industrial Catalysis, State Key Laboratory Breeding Base of Green-Chemical Synthesis Technology, College of Chemical Engineering, Zhejiang University of Technology, Hangzhou 310032, P.R. China.

<sup>b</sup>China Tobacco Zhejiang Industrial Co., Ltd., Hangzhou 310032, P.R. China.

\*Email: glzhuang@zjut.edu.cn (G. L. Zhuang), jiangj@zjtobacco.com (J. Jiang),  
jgw@zjut.edu.cn (J. g. Wang)

1. Fig. S1 Optimized structures of MN<sub>x</sub>B<sub>y</sub>. .....S4-S8
2. Fig. S2 Optimized structures of divacancy B, N doped graphene.  
.....S8
3. Table S1. Computed binding energies ( $E_b$ ) for 26 single atoms embedded in each  
substrate.  
.....S9
4. Table S2. Adsorption configurations of O<sub>2</sub><sup>\*</sup>, OOH<sup>\*</sup>, and H<sub>2</sub>O<sub>2</sub><sup>\*</sup> on each

|                                                                                                                                                                                                                 |         |
|-----------------------------------------------------------------------------------------------------------------------------------------------------------------------------------------------------------------|---------|
| thermodynamically stable system. ....                                                                                                                                                                           | S10-S17 |
| 5. Table S3. Adsorption energies of O <sub>2</sub> on various kinds of MN <sub>x</sub> B <sub>y</sub> .<br>.....                                                                                                | S18     |
| 6. Table S4. Adsorption energies of OOH on various kinds of MN <sub>x</sub> B <sub>y</sub> .<br>.....                                                                                                           | S18     |
| 7. Table S5. Adsorption energies of H <sub>2</sub> O <sub>2</sub> on various kinds of MN <sub>x</sub> B <sub>y</sub> .<br>.....                                                                                 | S19     |
| 8. Table S6. Computed zero-point energy ( <i>ZPE</i> ), entropy correction ( <i>TS</i> ), Gibbs free energies of OOH* ( $\Delta G_{\text{OOH}^*}$ ) and limited potentials ( $U_L$ ) on catalyst surfaces. .... | S19     |
| 9. Fig. S3 Adsorption configurations of O* and OH* on NiN <sub>2</sub> B <sub>2</sub> -h. ....                                                                                                                  | S19     |
| 10. Table S7. Computed zero-point energy ( <i>ZPE</i> ), entropy correction ( <i>TS</i> ) and Gibbs free energies ( $\Delta G$ ) of O* and OH* on NiN <sub>2</sub> B <sub>2</sub> -h. ....                      | S19     |
| 11. Fig. S4 Adsorption configuration of H* and Gibbs free energy diagram for HER on NiN <sub>2</sub> B <sub>2</sub> -h at $U = 0$ V. ....                                                                       | S20     |
| 12. Table S8. Computed zero-point energy ( <i>ZPE</i> ), entropy correction ( <i>TS</i> ) and Gibbs free energy ( $\Delta G$ ) of H* on NiN <sub>2</sub> B <sub>2</sub> -h. ....                                | S20     |
| 13. Table S9. Bond lengths, bond angles for NiN <sub>4</sub> , NiN <sub>2</sub> B <sub>2</sub> -h, O <sub>2</sub> *, OOH* and H <sub>2</sub> O <sub>2</sub> * on NiN <sub>2</sub> B <sub>2</sub> -h. ....       | S20     |
| 14. Table S10. Activation barrier ( $\Delta E_a$ ) for each elementary step of H <sub>2</sub> O <sub>2</sub> formation and side actions on NiN <sub>2</sub> B <sub>2</sub> -h. ....                             | S21     |
| 15. Fig. S5 Optimized structures of NiN <sub>4</sub> and O <sub>2</sub> adsorption on NiN <sub>4</sub> . ....                                                                                                   | S21     |
| 16. Fig. S6 Bader charge analysis of NiN <sub>4</sub> and NiN <sub>x</sub> B <sub>y</sub> . ....                                                                                                                | S22     |
| 17. Table S11. Bader charge analysis of Ni atoms and O atoms connected with Ni in O <sub>2</sub> *, OOH* species on NiN <sub>x</sub> B <sub>y</sub> and NiN <sub>4</sub> . ....                                 | S22     |
| 18. Table S12. Bond lengths for O <sub>2</sub> *, OOH* and H <sub>2</sub> O <sub>2</sub> * on the NiN <sub>2</sub> B <sub>2</sub> -h in gas and SO <sub>4</sub> <sup>2-</sup> anion solution. ....              | S22     |
| 19. Fig. S7 The total energy change of NiN <sub>2</sub> B <sub>2</sub> -h under 0.5M H <sub>2</sub> SO <sub>4</sub> solution after 10                                                                           |         |

ps AIMD simulation at 298.15 K. ....S23

20. Table S13. Activation barrier ( $\Delta E_a$ ) for each elementary step of  $H_2O_2$  formation and side actions on  $NiN_2B_2-h$  under  $SO_4^{2-}$  anion solution. ....S23

21. Fig. S8 Energy and profile of optimized structures for the  $O_2$  hydrogenation to  $H_2O_2^*$  on  $NiN_2B_2-h$  under  $SO_4^{2-}$  anion solution when H atoms are gained from support directly. ....S24

22. Fig. S9 Energy and profile of optimized structures for the  $O_2$  hydrogenation to  $H_2O_2^*$  on  $NiN_2B_2-h$  under  $SO_4^{2-}$  anion solution when H atoms are gained from  $H_3O^+$ . .... S25

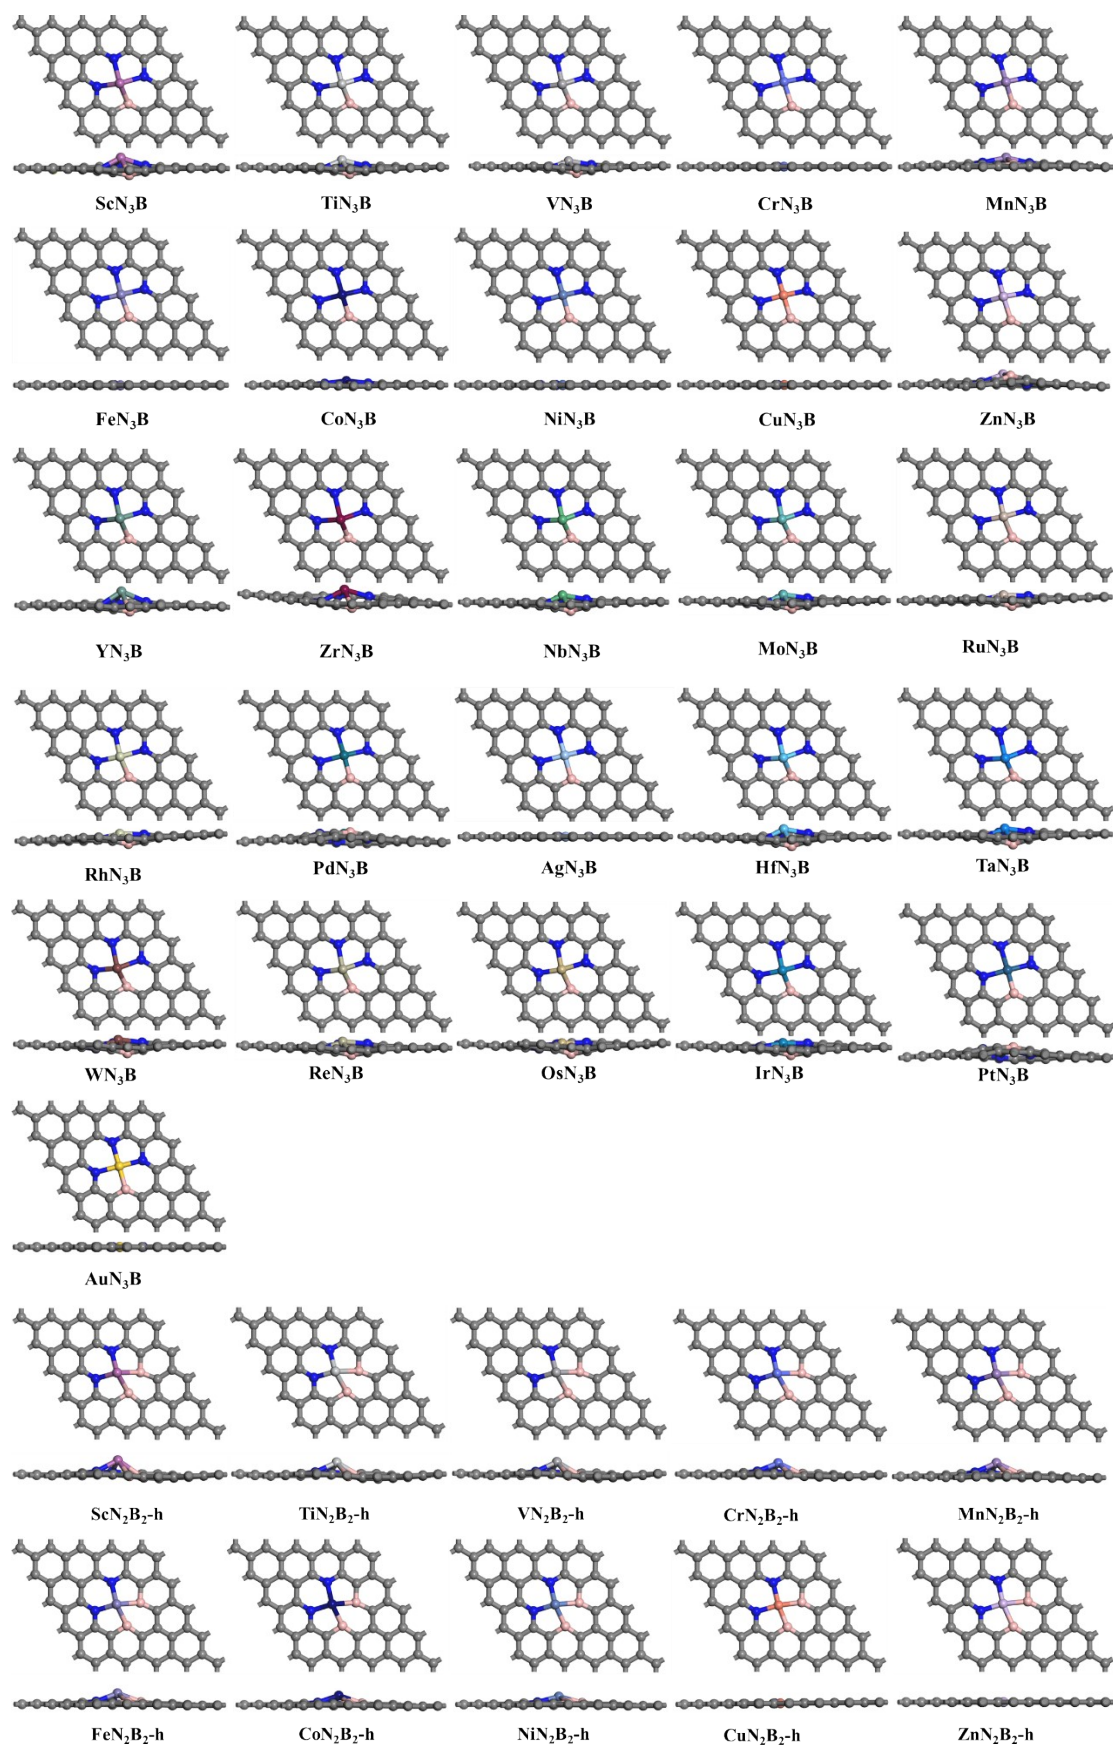

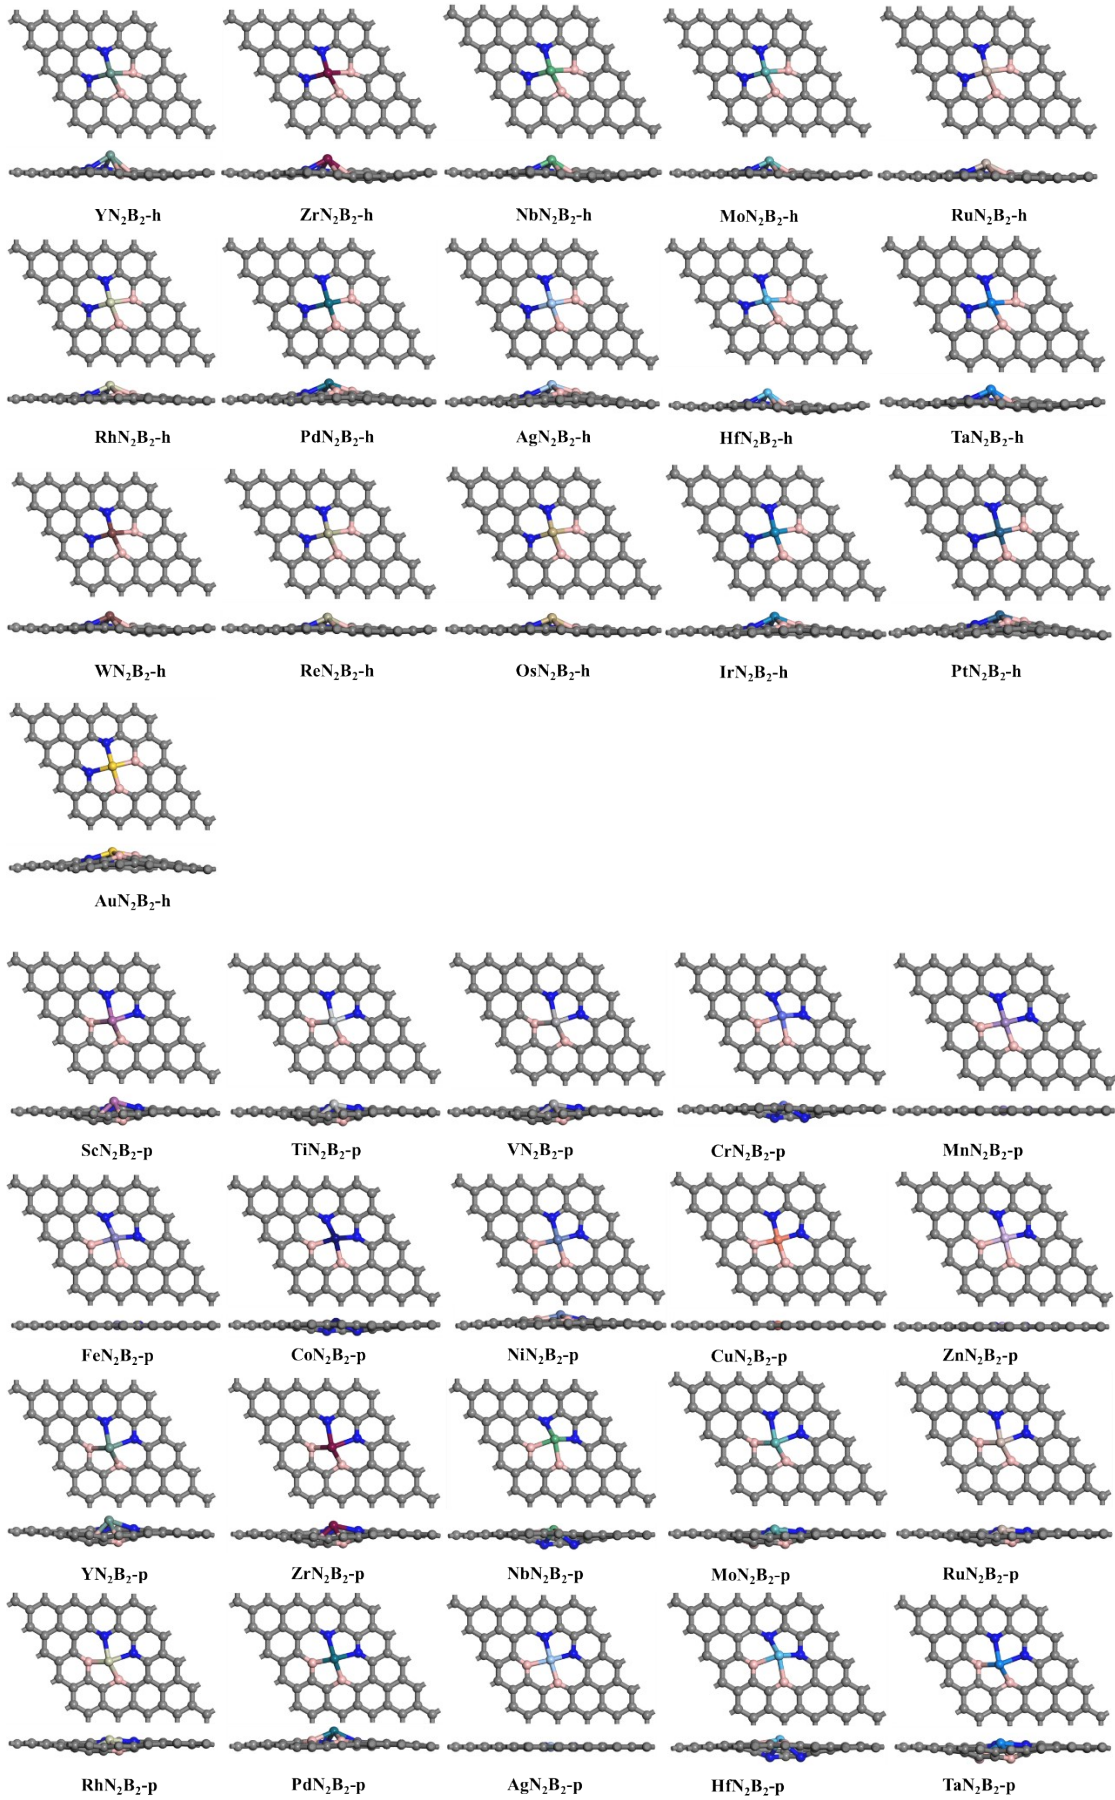

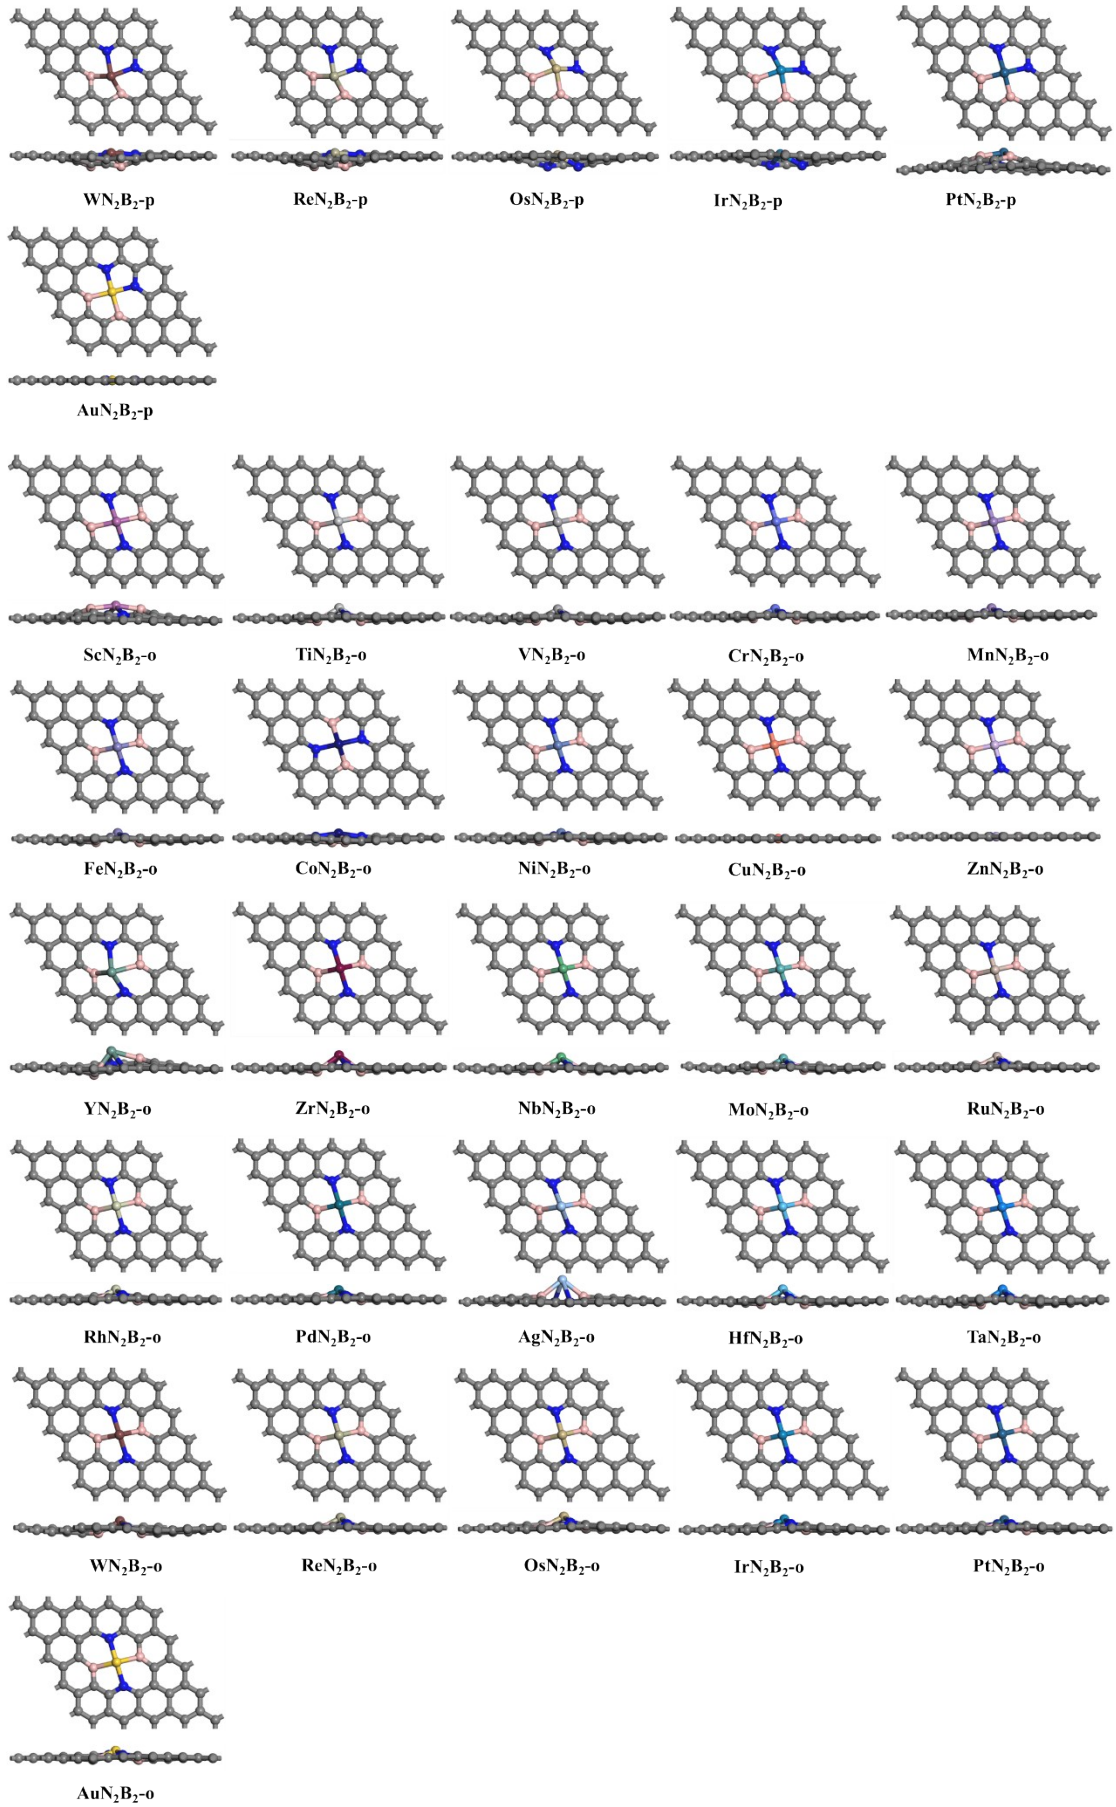

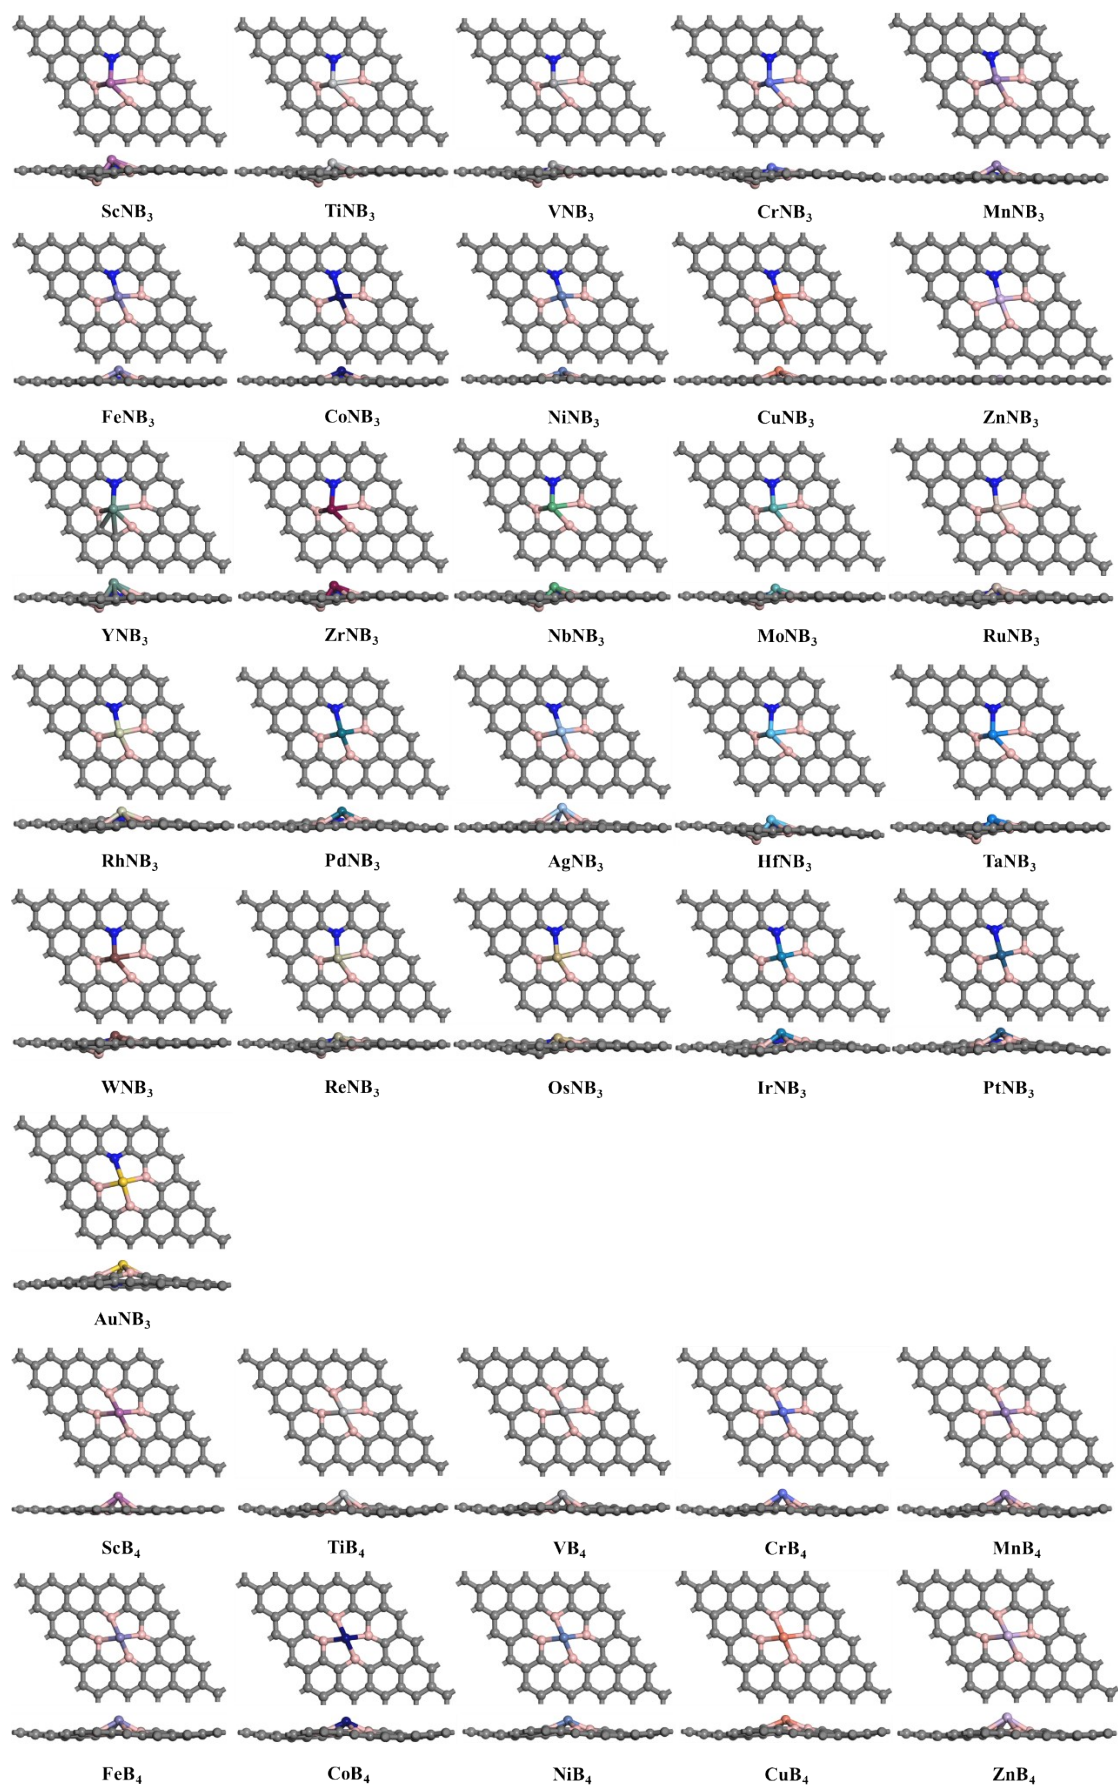

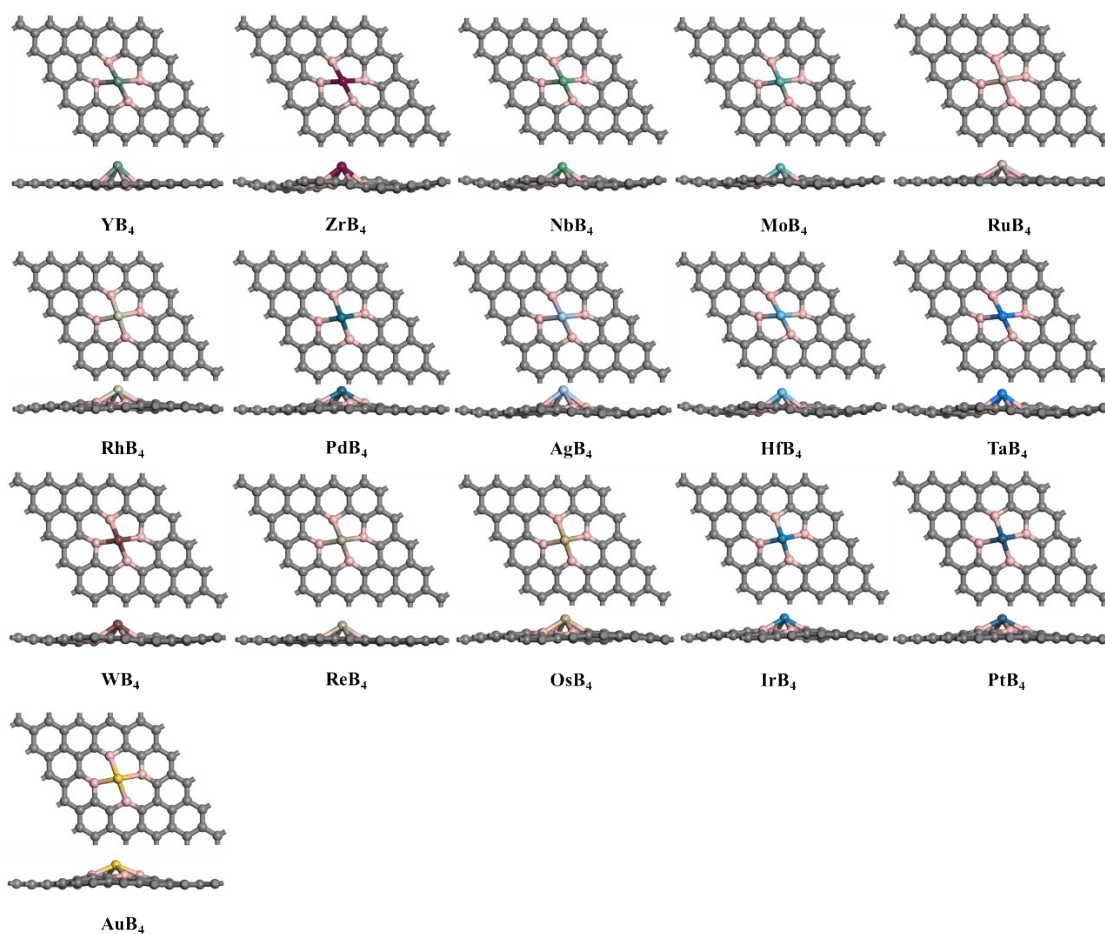

Fig. S1 Optimized structures of  $MN_3B$ ,  $MN_2B_2$ -h,  $MN_2B_2$ -p,  $MN_2B_2$ -o,  $MNB_3$ ,  $MB_4$ .

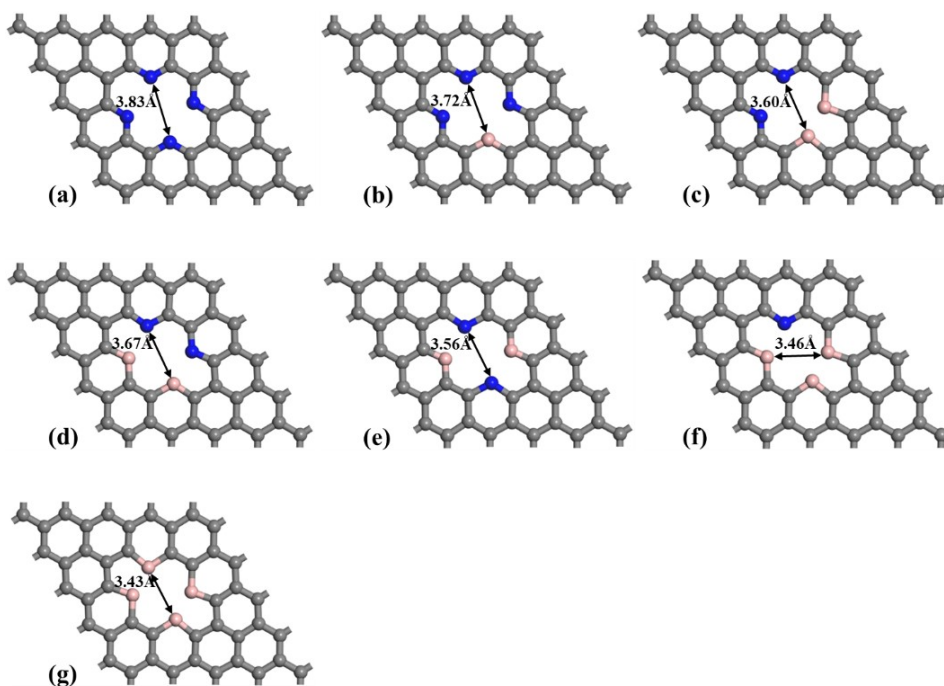

Fig. S2 Optimized structures of (a)  $V\_N_4$ -gra, (b)  $V\_N_3B$ -gra, (c)  $V\_N_2B_2$ -h-gra, (d)  $V\_N_2B_2$ -p-gra, (e)  $V\_N_2B_2$ -p-gra, (f)  $V\_NB_3$ -gra, (g)  $V\_B_4$ -gra.



Table S1. Computed binding energies ( $E_b$ ) for 26 single atoms embedded in each substrate. The thermodynamically unstable systems are highlighted by red color.

| Metal | Binding Energy ( $E_b$ , eV) |                                   |                                   |                                   |                  |                 |
|-------|------------------------------|-----------------------------------|-----------------------------------|-----------------------------------|------------------|-----------------|
|       | MN <sub>3</sub> B            | MN <sub>2</sub> B <sub>2</sub> -h | MN <sub>2</sub> B <sub>2</sub> -p | MN <sub>2</sub> B <sub>2</sub> -o | MNB <sub>3</sub> | MB <sub>4</sub> |
| Sc    | -2.13                        | -3.32                             | -0.54                             | 0.18                              | -0.75            | -0.79           |
| Ti    | -1.36                        | -1.99                             | 0.15                              | 0.56                              | 0.15             | 0.51            |
| V     | -0.32                        | -0.74                             | 1.39                              | 0.99                              | 0.96             | 1.10            |
| Cr    | 0.13                         | -0.93                             | 0.88                              | 1.18                              | 1.03             | 1.22            |
| Mn    | -1.06                        | -1.30                             | 1.15                              | 0.03                              | 0.30             | 0.61            |
| Fe    | -0.48                        | -0.89                             | 0.93                              | 0.25                              | 0.45             | 0.63            |
| Co    | -0.60                        | -0.90                             | 0.36                              | 0.19                              | 0.24             | 0.37            |
| Ni    | -1.31                        | -1.15                             | 0.13                              | -0.14                             | -0.20            | -0.14           |
| Cu    | -0.90                        | -1.28                             | 0.08                              | 1.16                              | 0.53             | 0.24            |
| Zn    | -0.54                        | -2.10                             | 0.00                              | 2.06                              | 1.11             | 0.42            |
| Y     | -2.00                        | -3.31                             | -0.67                             | 0.18                              | -0.74            | -1.06           |
| Zr    | -1.37                        | -2.03                             | 0.08                              | 0.64                              | 0.04             | 0.40            |
| Nb    | 0.12                         | -0.37                             | 0.88                              | 1.21                              | 1.31             | 1.53            |
| Mo    | 1.09                         | 0.53                              | 1.56                              | 1.67                              | 1.95             | 1.94            |
| Ru    | 0.77                         | -0.02                             | 0.77                              | 1.09                              | 0.90             | 0.79            |
| Rh    | 0.11                         | -0.14                             | 0.21                              | 0.05                              | 0.12             | -0.24           |
| Pd    | -0.17                        | -0.33                             | 0.46                              | -0.05                             | 0.00             | -0.07           |
| Ag    | 0.64                         | 0.06                              | 1.77                              | 1.40                              | 1.11             | 1.07            |
| Hf    | -1.17                        | -1.70                             | 0.43                              | 0.96                              | 0.39             | 0.86            |
| Ta    | 0.48                         | 0.23                              | 1.37                              | 1.67                              | 1.78             | 2.33            |
| W     | 1.76                         | 1.55                              | 2.21                              | 2.31                              | 2.62             | 2.97            |
| Re    | 2.26                         | 1.20                              | 1.94                              | 2.17                              | 2.17             | 2.26            |
| Os    | 1.65                         | 0.92                              | 1.62                              | 1.81                              | 1.58             | 1.43            |
| Ir    | 0.75                         | 0.40                              | 0.88                              | 0.61                              | 0.57             | 0.09            |
| Pt    | -0.18                        | -0.36                             | 0.26                              | -0.12                             | -0.35            | -0.48           |
| Au    | 0.29                         | -0.48                             | 0.90                              | 1.65                              | 0.57             | 0.40            |

Table S2. Adsorption configurations of  $O_2^*$ ,  $OOH^*$ , and  $H_2O_2^*$  on each thermodynamically stable system.

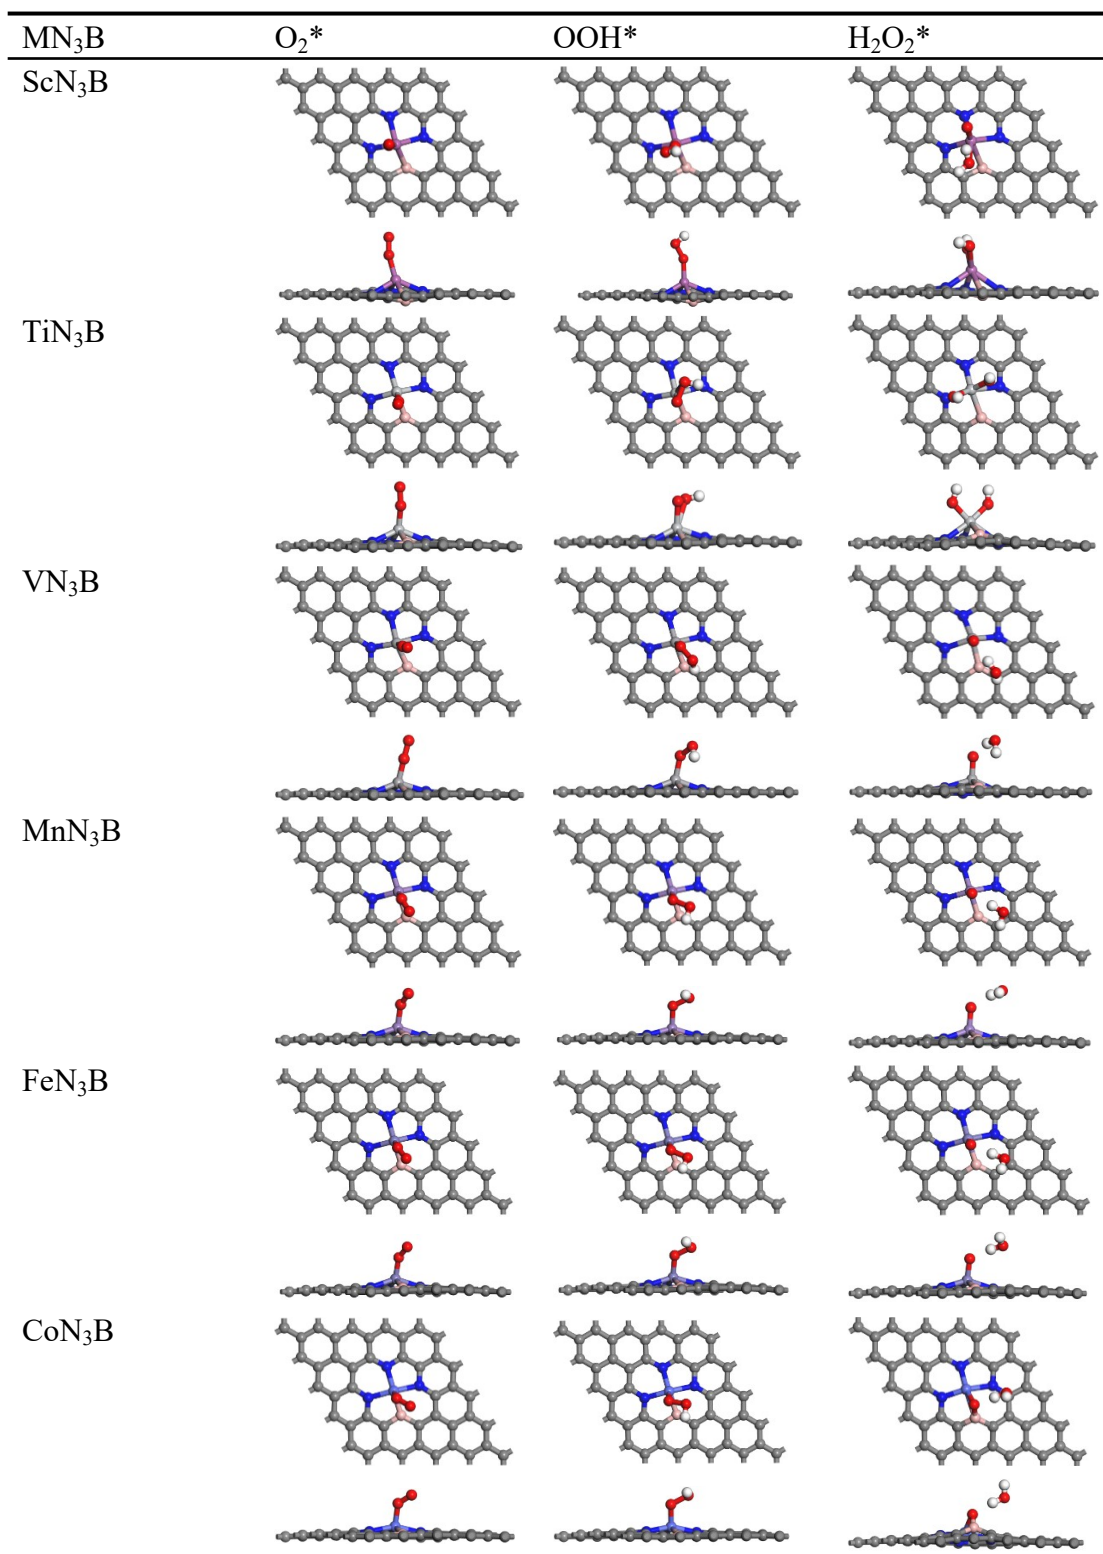

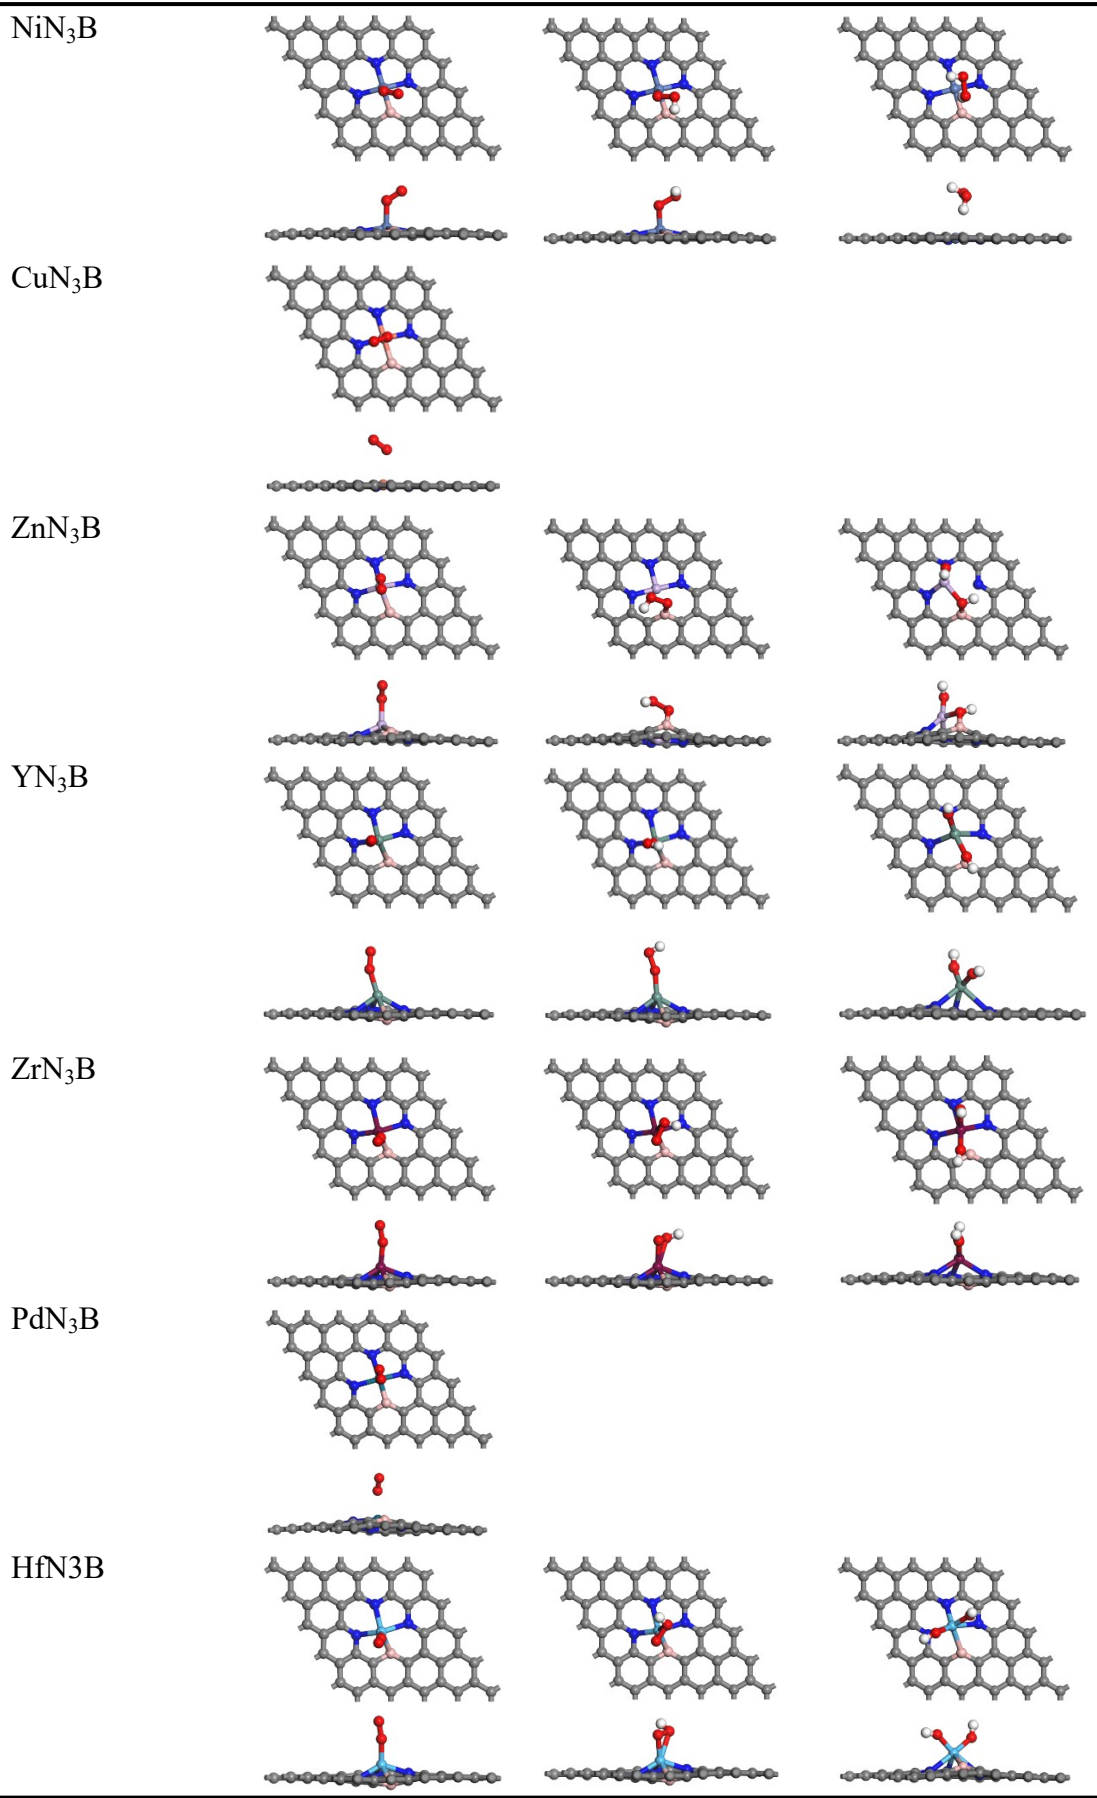

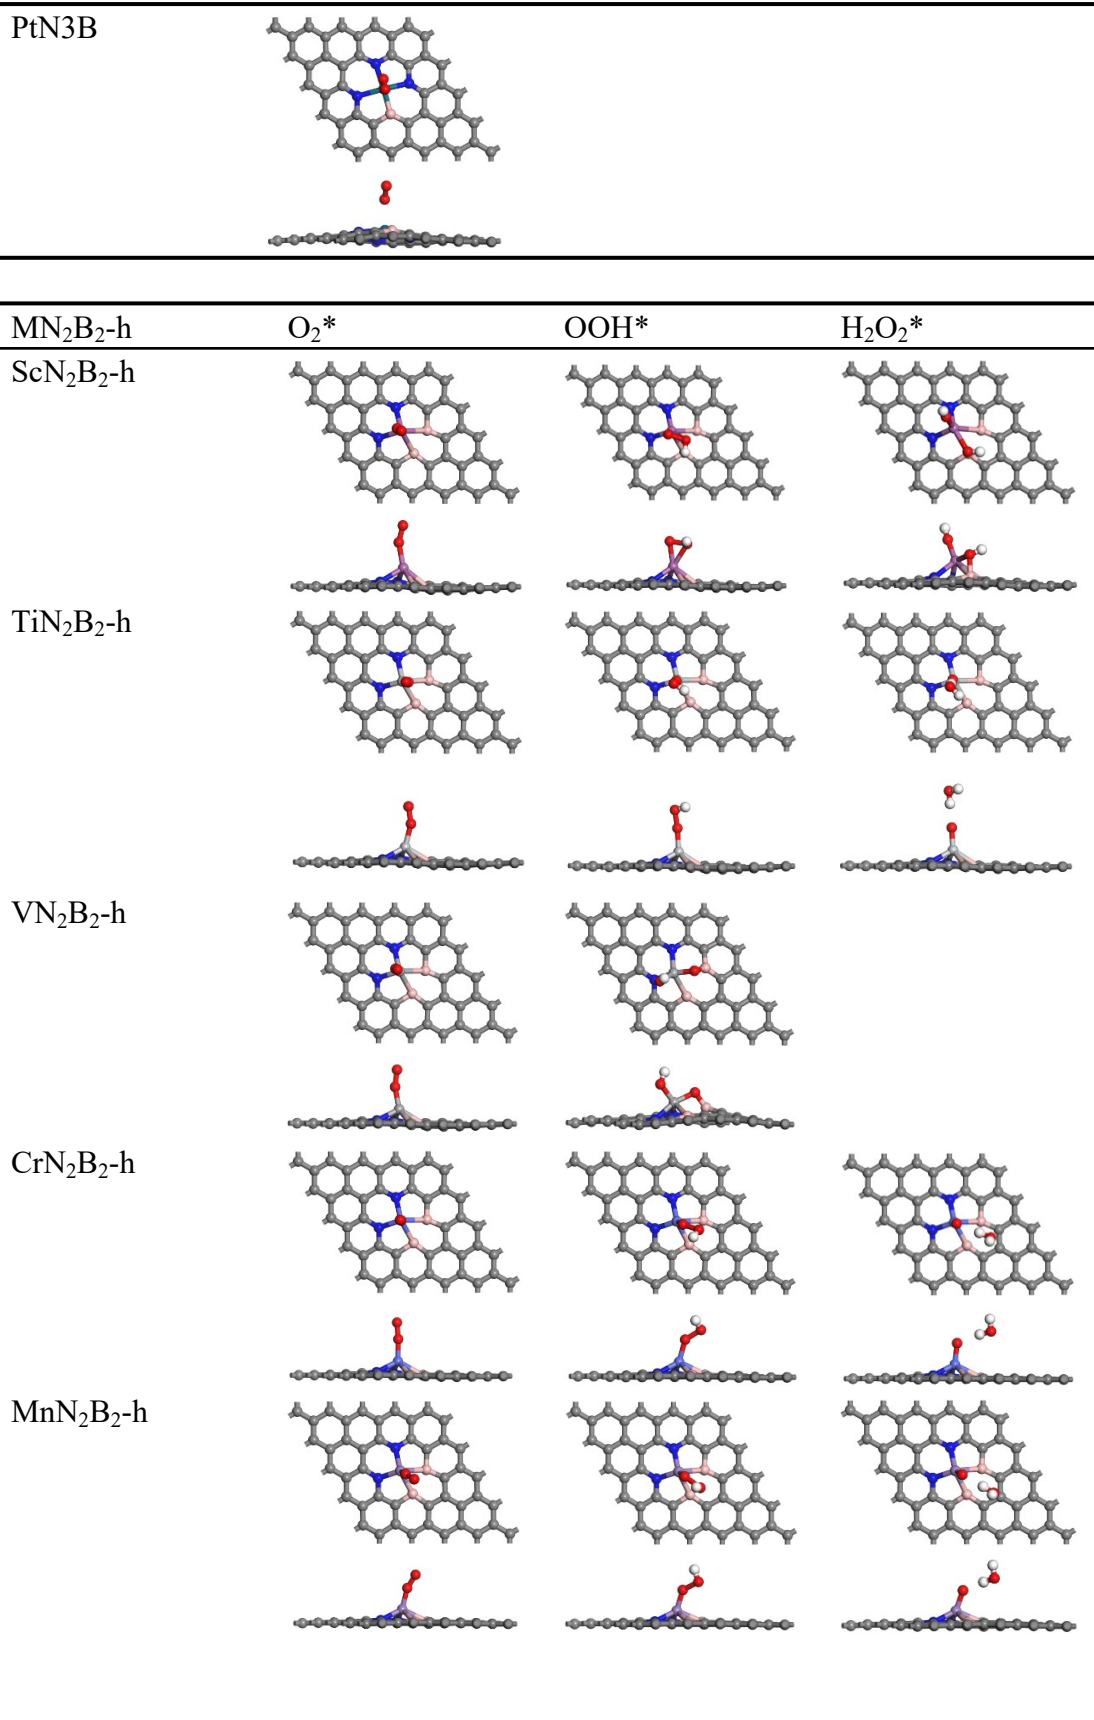

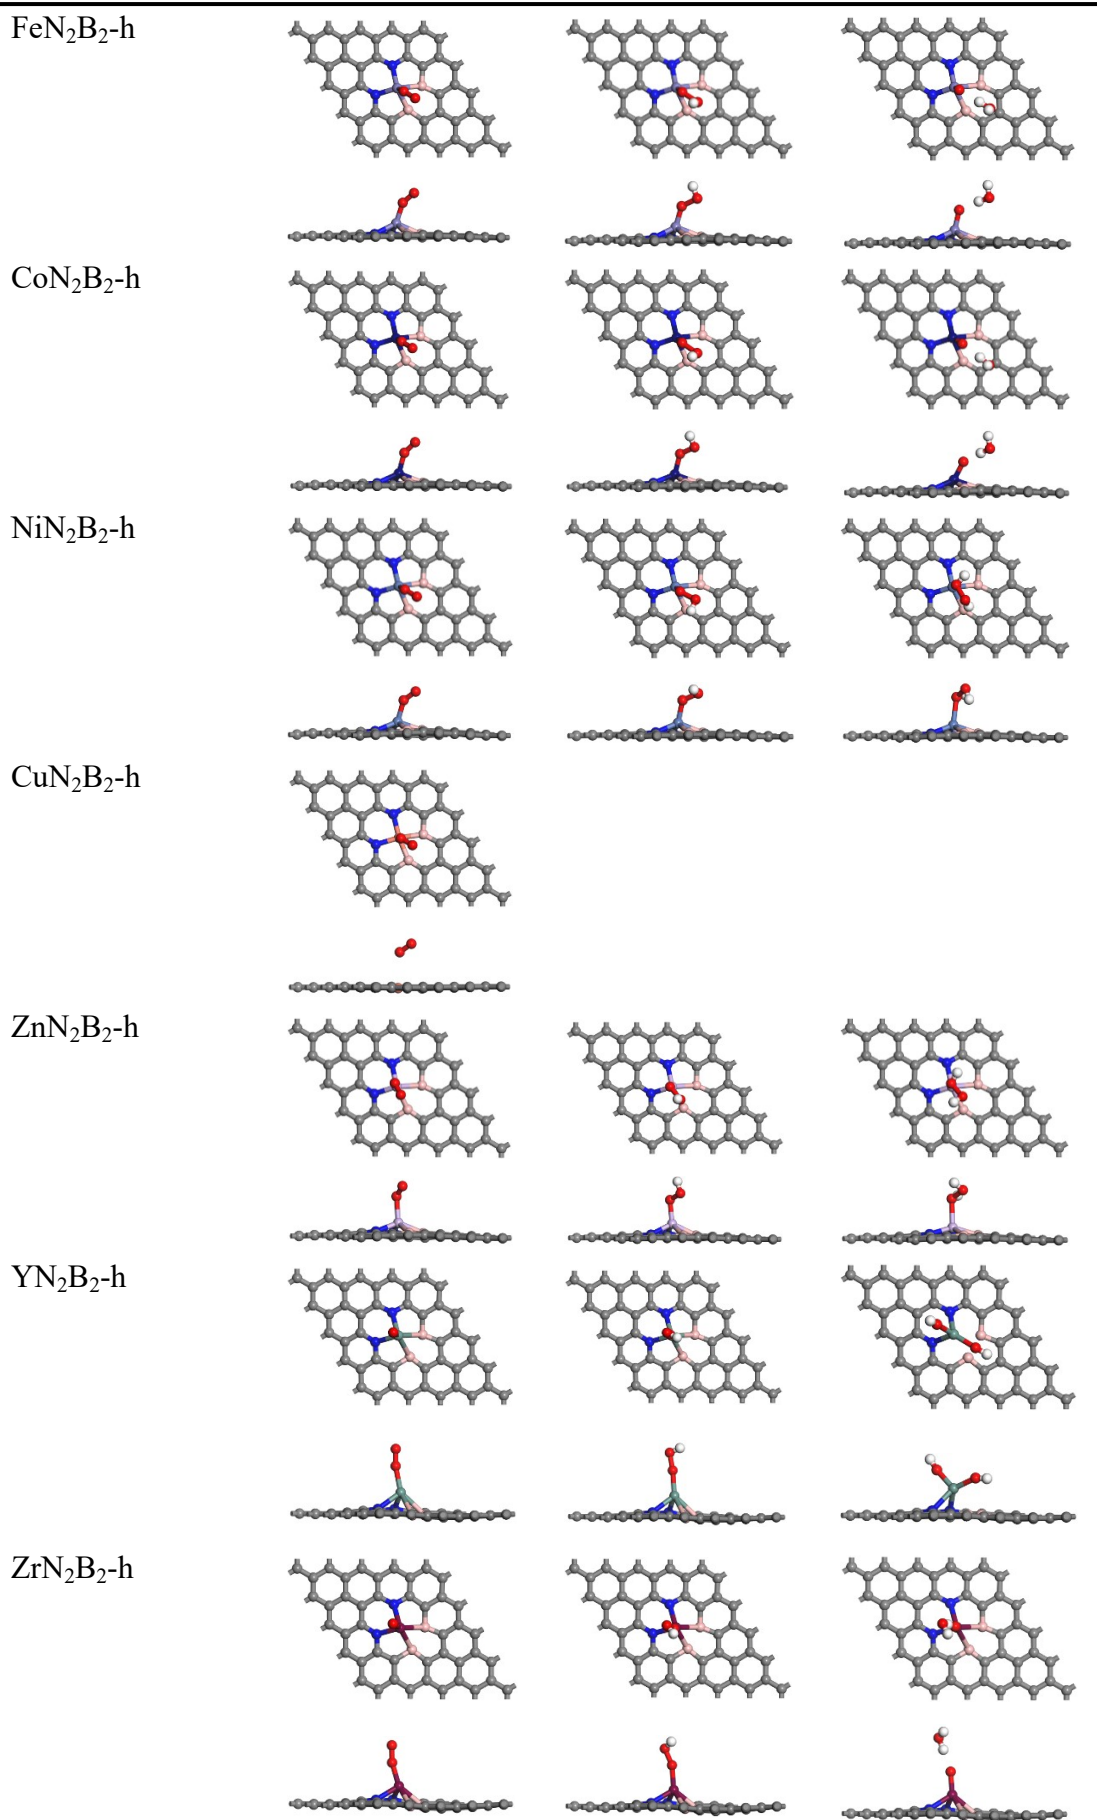

---

NbN<sub>2</sub>B<sub>2</sub>-h

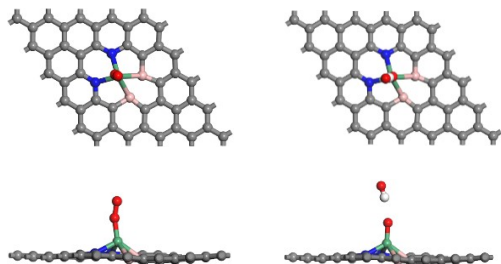

RuN<sub>2</sub>B<sub>2</sub>-h

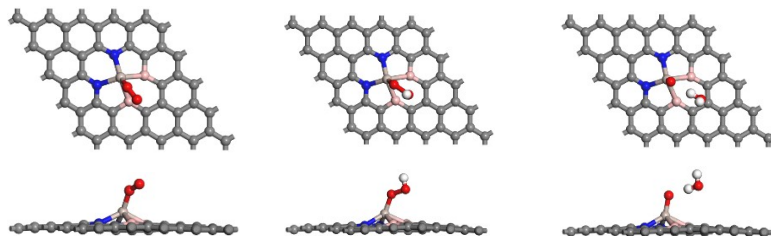

RhN<sub>2</sub>B<sub>2</sub>-h

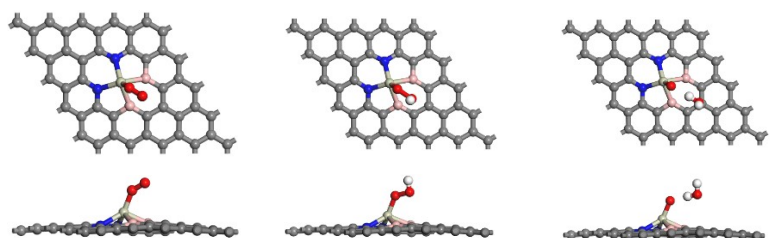

PdN<sub>2</sub>B<sub>2</sub>-h

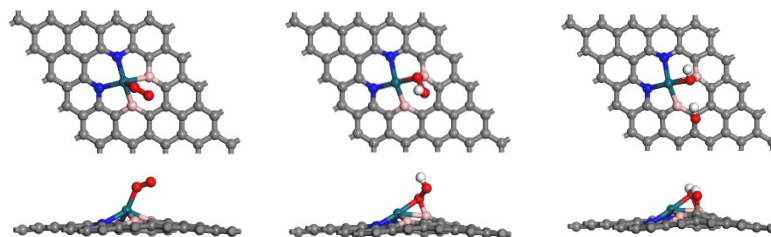

HfN<sub>2</sub>B<sub>2</sub>-h

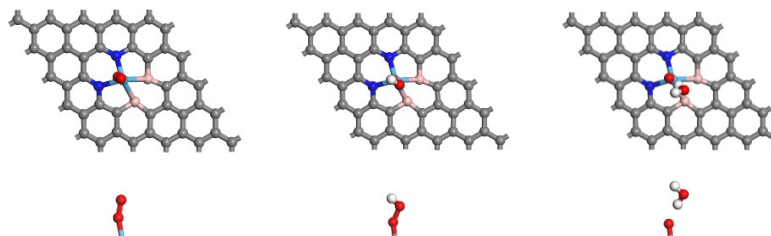

PtN<sub>2</sub>B<sub>2</sub>-h

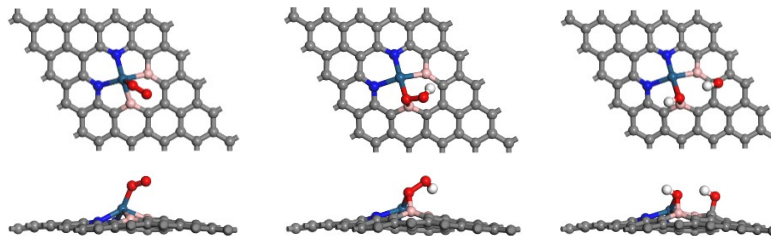

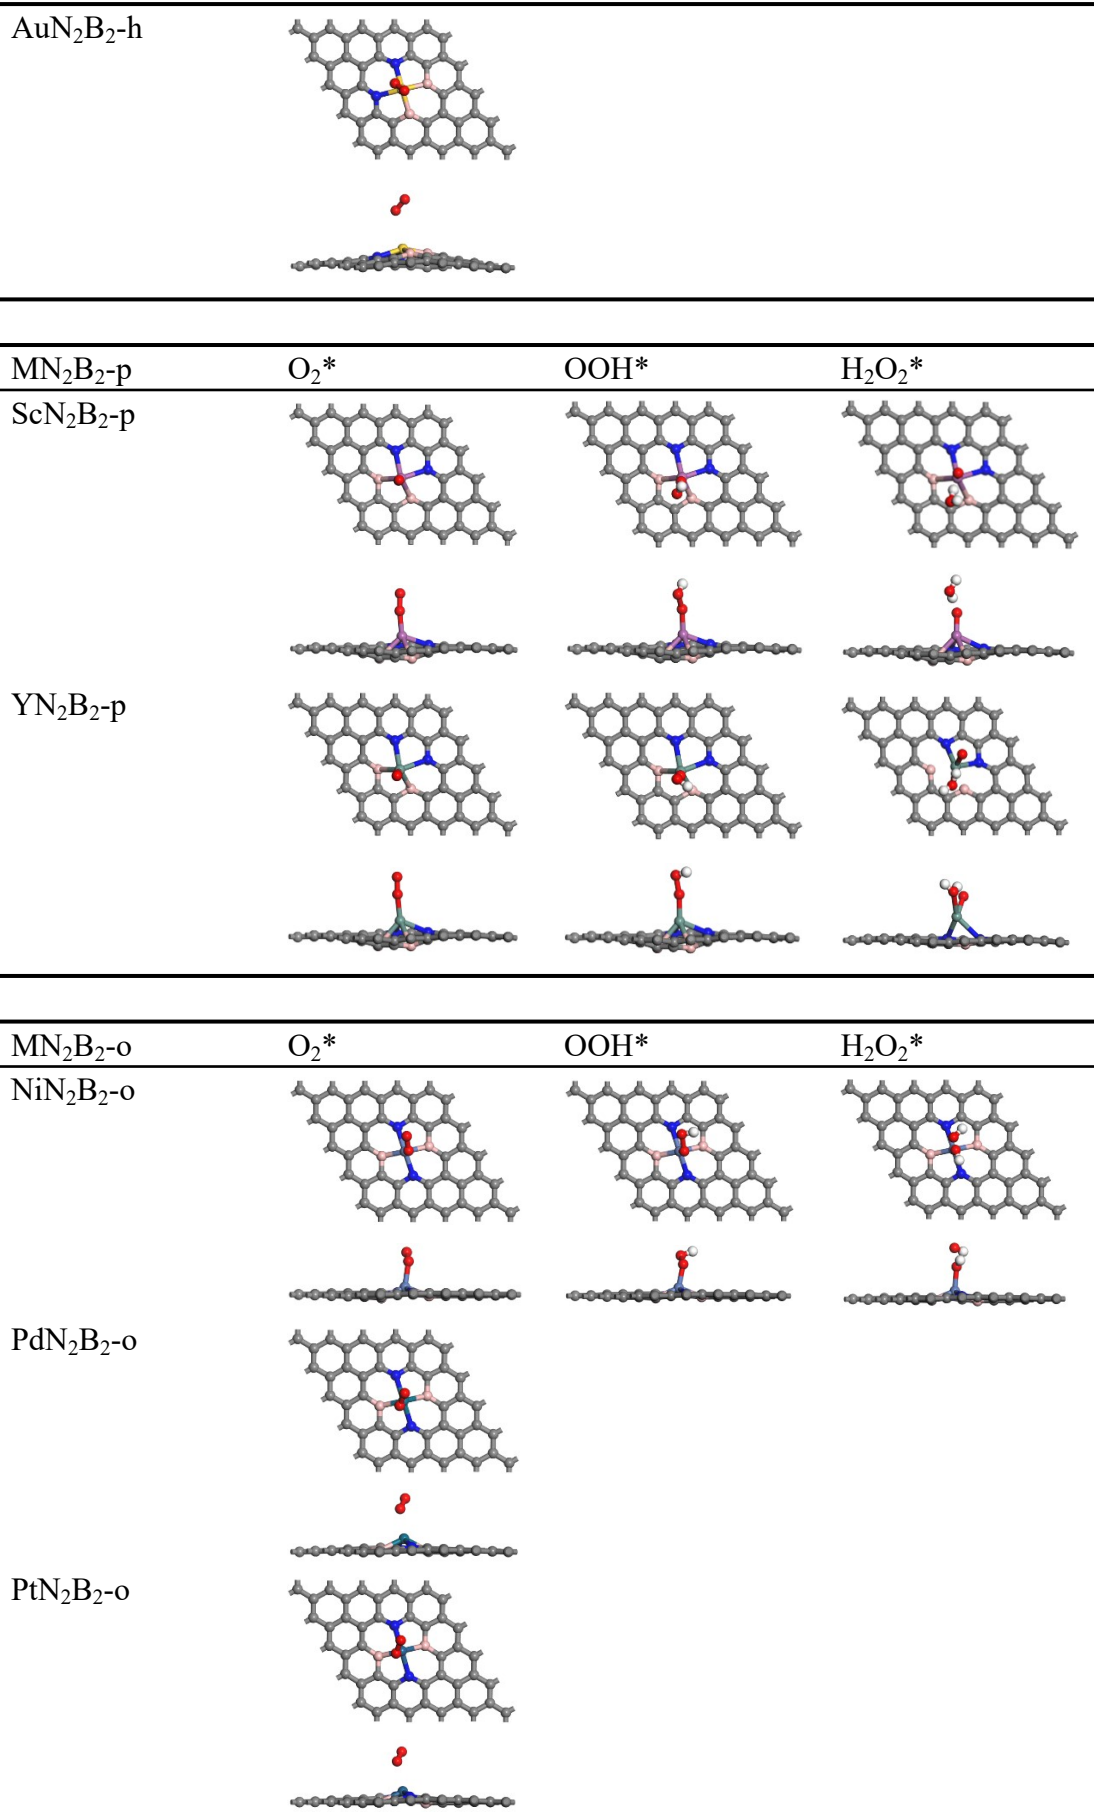

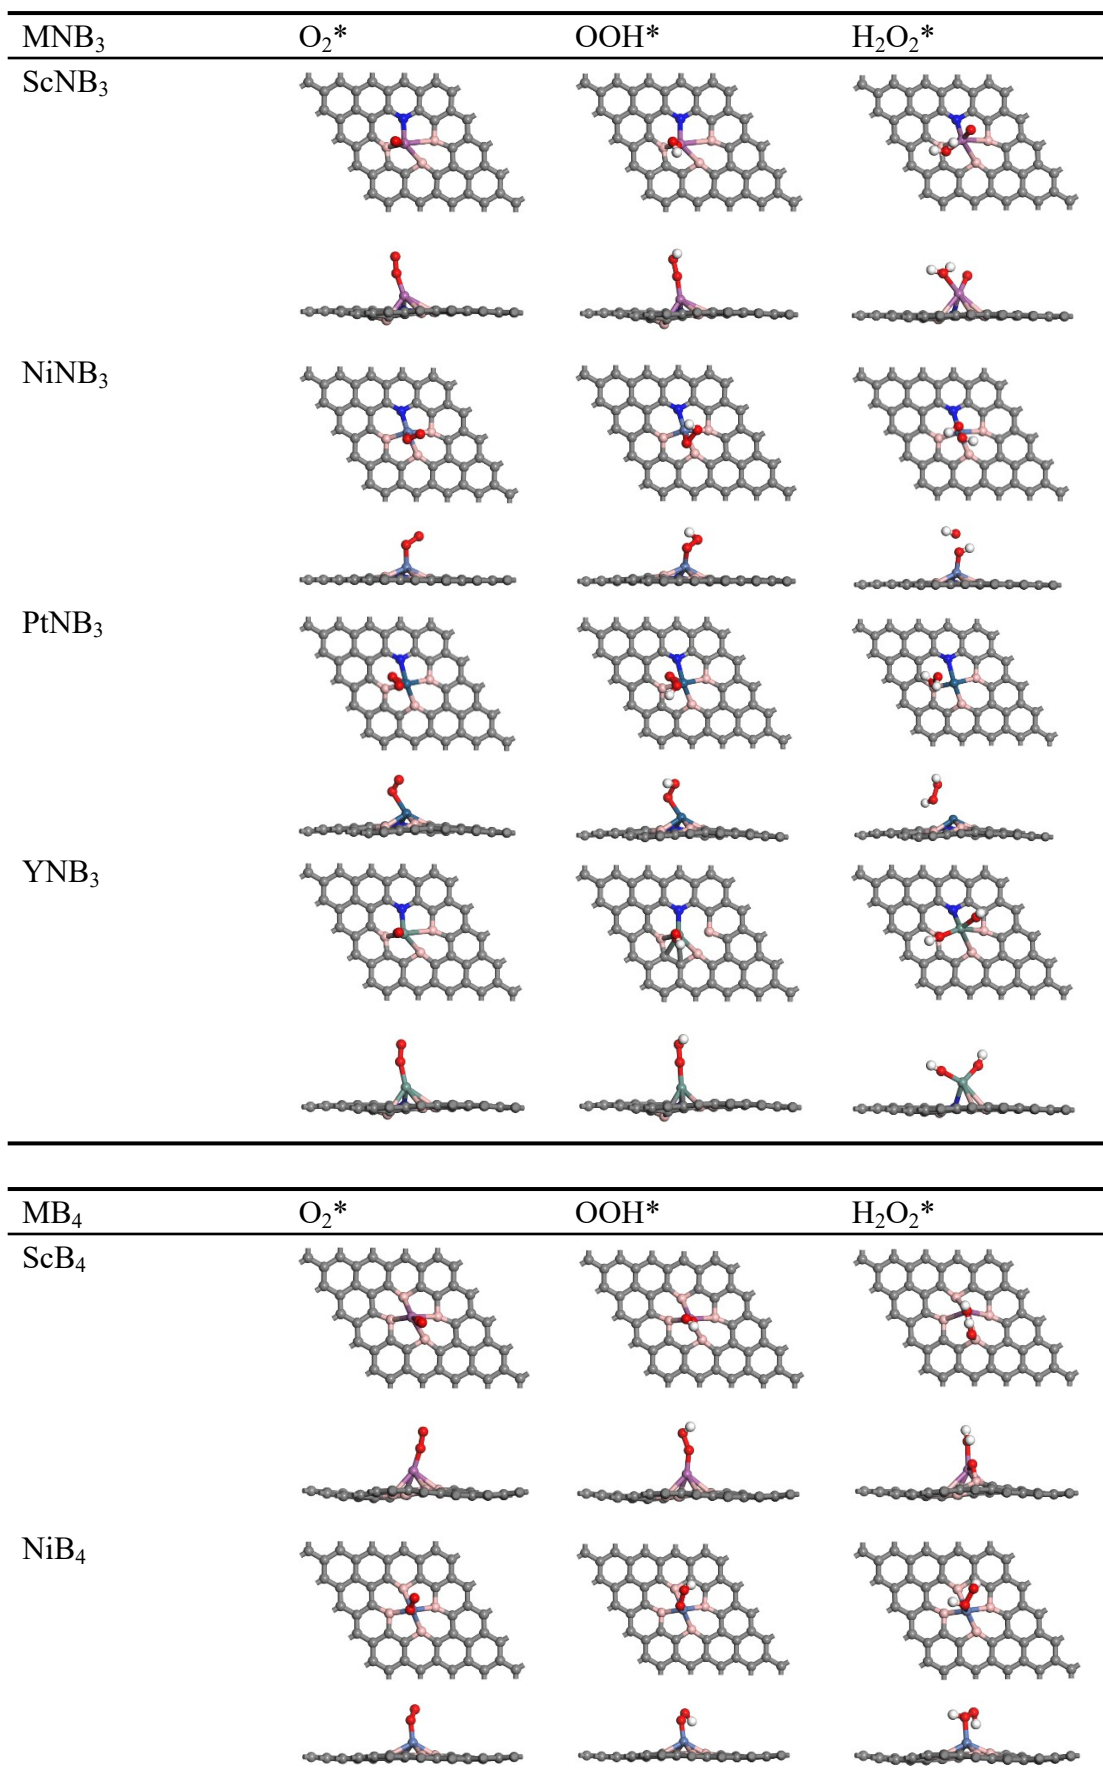



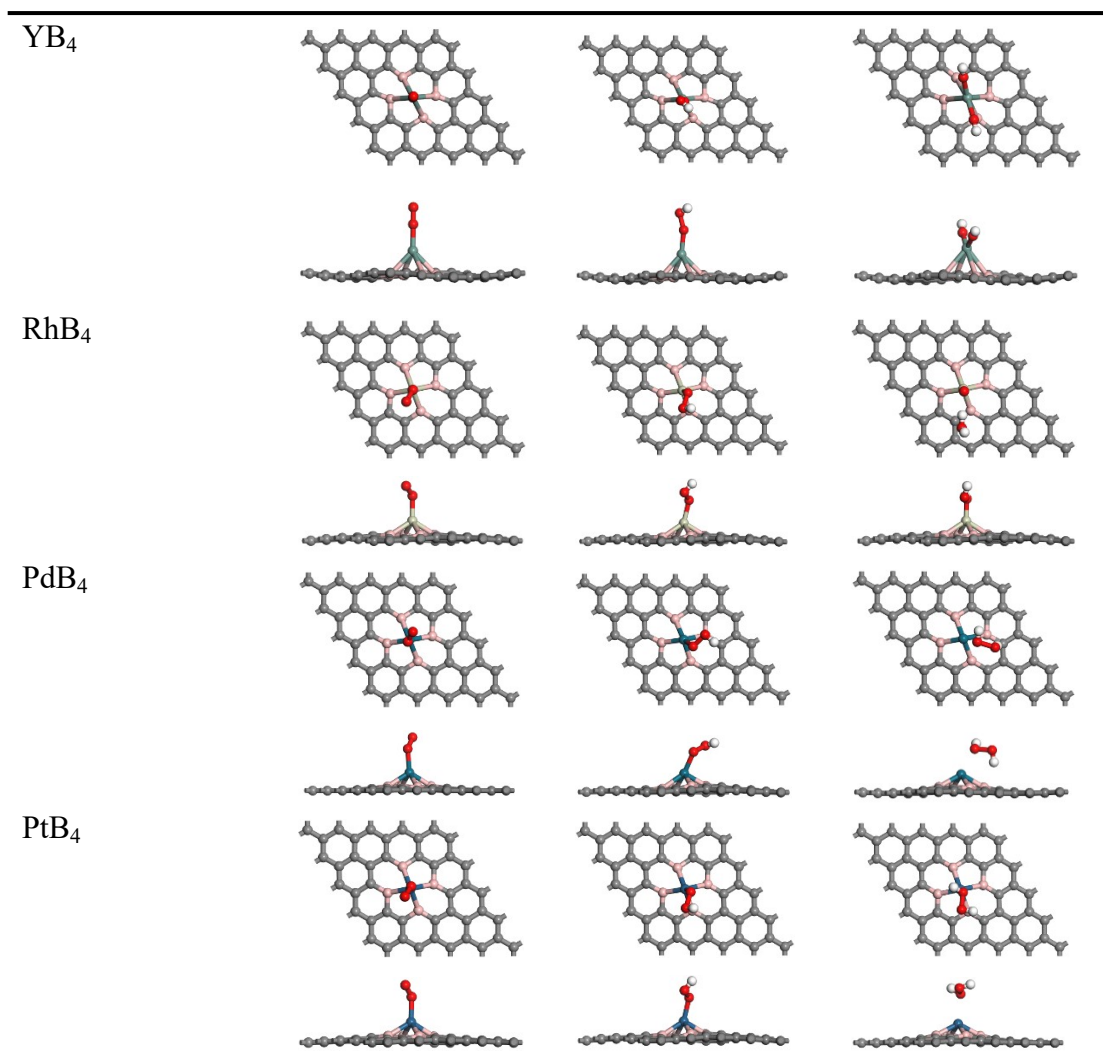

Table S3. Adsorption energies of O<sub>2</sub> on various kinds of MN<sub>x</sub>B<sub>y</sub>.

| Metal | $E_{\text{ads}}(\text{O}_2, \text{eV})$ |                                   |                                   |                                   |                  |                 |
|-------|-----------------------------------------|-----------------------------------|-----------------------------------|-----------------------------------|------------------|-----------------|
|       | MN <sub>3</sub> B                       | MN <sub>2</sub> B <sub>2</sub> -h | MN <sub>2</sub> B <sub>2</sub> -p | MN <sub>2</sub> B <sub>2</sub> -o | MNB <sub>3</sub> | MB <sub>4</sub> |
| Sc    | -1.81                                   | -1.98                             | -1.83                             |                                   | -1.77            | -1.93           |
| Ti    | -2.12                                   | -2.53                             |                                   |                                   |                  |                 |
| V     | -2.55                                   | -2.88                             |                                   |                                   |                  |                 |
| Cr    |                                         | -2.16                             |                                   |                                   |                  |                 |
| Mn    | -1.60                                   | -1.82                             |                                   |                                   |                  |                 |
| Fe    | -1.77                                   | -1.68                             |                                   |                                   |                  |                 |

|    |       |       |       |       |       |       |
|----|-------|-------|-------|-------|-------|-------|
| Co | -1.36 | -1.65 |       |       |       |       |
| Ni | -0.46 | -0.91 |       | -0.67 | -0.71 | -0.90 |
| Zn | -0.36 | -0.45 |       |       |       |       |
| Y  | -1.17 | -1.95 | -1.65 |       | -1.83 | -1.86 |
| Zr | -2.05 | -2.68 |       |       |       |       |
| Nb |       | -2.83 |       |       |       |       |
| Ru |       | -1.54 |       |       |       |       |
| Rh |       | -1.81 |       |       |       | -0.92 |
| Pd |       | -1.07 |       |       |       | -0.50 |
| Hf | -2.30 | -2.96 |       |       |       |       |
| Pt |       | -1.18 |       |       | -0.40 | -0.65 |

Table S4. Adsorption energies of OOH on various kinds of  $MN_xB_y$ .

| Metal | $E_{ads}$ (OOH, eV) |              |              |              |         |        |
|-------|---------------------|--------------|--------------|--------------|---------|--------|
|       | $MN_3B$             | $MN_2B_2$ -h | $MN_2B_2$ -p | $MN_2B_2$ -o | $MNB_3$ | $MB_4$ |
| Sc    | -3.15               | -3.90        | -3.20        |              | -3.11   | -3.41  |
| Ti    | -3.62               | -3.53        |              |              |         |        |
| V     | -3.52               |              |              |              |         |        |
| Cr    |                     | -3.97        |              |              |         |        |
| Mn    | -2.42               | -2.67        |              |              |         |        |
| Fe    | -2.39               | -3.73        |              |              |         |        |
| Co    | -2.18               | -2.28        |              |              |         |        |
| Ni    | -1.15               | -1.60        |              | -1.64        | -1.56   | -1.81  |
| Zn    | -3.23               | -1.35        |              |              |         |        |
| Y     | -3.26               | -3.37        | -3.11        |              | -3.34   | -3.33  |
| Zr    | -3.62               | -4.11        |              |              |         |        |
| Nb    |                     | -4.05        |              |              |         |        |
| Ru    |                     | -2.89        |              |              |         |        |
| Rh    |                     | -2.72        |              |              |         | -2.11  |
| Pd    |                     | -2.72        |              |              |         | -1.82  |
| Hf    | -3.87               | -4.21        |              |              |         |        |
| Pt    |                     | -2.61        |              |              | -1.29   | -2.02  |

Table S5. Adsorption energies of  $H_2O_2$  on various kinds of  $MN_xB_y$ .

| Catalyst                   | $NiN_2B_2$ -h | $ZnN_2B_2$ -h | $NiB_4$ |
|----------------------------|---------------|---------------|---------|
| $E_{ads}$ ( $H_2O_2$ , eV) | -0.57         | -0.47         | -0.75   |

Table S6. Computed zero-point energy ( $ZPE$ ), entropy correction ( $TS$ ), Gibbs free energies of  $OOH^*$  ( $\Delta G_{OOH^*}$ ) and limited potentials ( $U_L$ ) on catalyst surfaces. All free energies are computed relative to  $H_2O$  (l) and  $H_2$  (g). The temperature is set to 298.15

K.

| Catalyst                           | ZPE (eV) | TS (eV) | $\Delta G_{\text{OOH}^*}$ (eV) | $U_L$ (V) |
|------------------------------------|----------|---------|--------------------------------|-----------|
| NiN <sub>3</sub> B                 | 0.43     | 0.22    | 4.56                           | 0.36      |
| NiN <sub>2</sub> B <sub>2</sub> -h | 0.43     | 0.22    | 4.10                           | 0.58      |
| ZnN <sub>2</sub> B <sub>2</sub> -h | 0.43     | 0.21    | 4.36                           | 0.56      |
| PtNB <sub>3</sub>                  | 0.43     | 0.20    | 4.44                           | 0.48      |
| NiB <sub>4</sub>                   | 0.44     | 0.14    | 3.98                           | 0.46      |
| PdB <sub>4</sub>                   | 0.44     | 0.22    | 3.90                           | 0.38      |
| PtB <sub>4</sub>                   | 0.44     | 0.21    | 3.71                           | 0.19      |

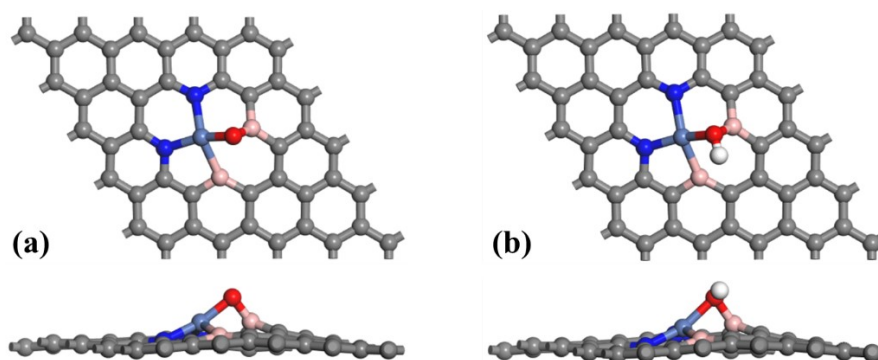

Fig. S3 Adsorption configurations of O\* and OH\* on NiN<sub>2</sub>B<sub>2</sub>-h.

Table S7. Computed zero-point energy (ZPE), entropy correction (TS) and Gibbs free energies ( $\Delta G$ ) of O\* and OH\* on NiN<sub>2</sub>B<sub>2</sub>-h. All free energies are computed relative to H<sub>2</sub>O (l) and H<sub>2</sub> (g). The temperature is set to 298.15 K.

| Adsorbates | ZPE (eV) | TS (eV) | $\Delta G$ (eV) |
|------------|----------|---------|-----------------|
| O*         | 0.10     | 0.03    | 0.32            |
| OH*        | 0.42     | 0.04    | 0.14            |

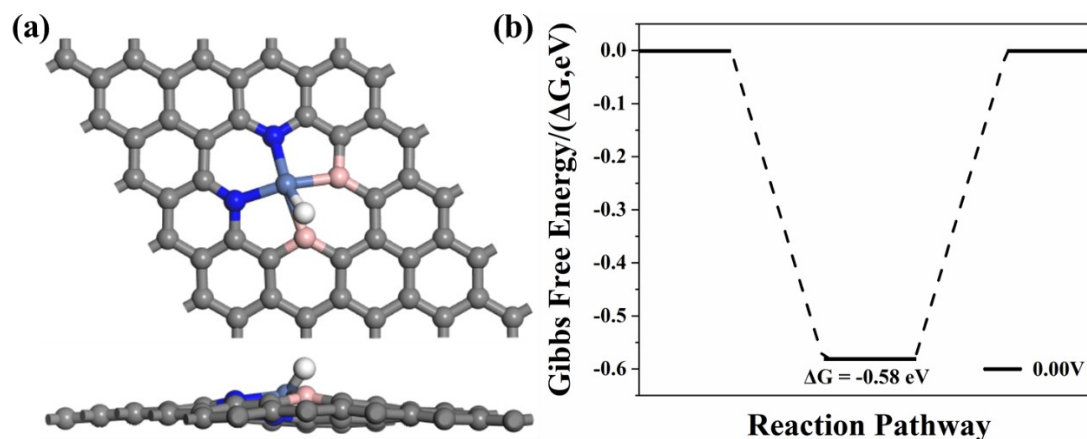

Fig. S4 Adsorption configuration of H\* and Gibbs free energy diagram for HER on

NiN<sub>2</sub>B<sub>2</sub>-h at U = 0 V.

Table S8. Computed zero-point energy (ZPE), entropy correction (TS) and Gibbs free energy ( $\Delta G$ ) of H\* on NiN<sub>2</sub>B<sub>2</sub>-h. All free energies are computed relative to H<sub>2</sub>O (l) and H<sub>2</sub> (g). The temperature is set to 298.15 K.

| Adsorbates | ZPE (eV) | TS (eV) | $\Delta G$ (eV) |
|------------|----------|---------|-----------------|
| H*         | 0.24     | 0.01    | -0.58           |

Table S9. Parameters for NiN<sub>4</sub>, NiN<sub>2</sub>B<sub>2</sub>-h, O<sub>2</sub>\*, OOH\* and H<sub>2</sub>O<sub>2</sub>\* on NiN<sub>2</sub>B<sub>2</sub>-h: bond lengths, bond angles. The N-Ni-N bond angle of NiN<sub>4</sub> is in the hexatomic ring.

| Species                            | Bond length (Å) |      |      |      | Bond angle (degree) |        |
|------------------------------------|-----------------|------|------|------|---------------------|--------|
|                                    | Ni-O            | O-O  | Ni-B | Ni-N | B-Ni-B              | N-Ni-N |
| NiN <sub>4</sub>                   |                 |      |      | 1.88 |                     | 88.08  |
| NiN <sub>2</sub> B <sub>2</sub> -h |                 |      | 2.00 | 1.89 | 66.86               | 90.00  |
| O <sub>2</sub> *                   | 1.75            | 1.28 | 2.07 | 1.98 | 69.72               | 84.93  |
| OOH*                               | 1.79            | 1.44 | 2.07 | 1.94 | 64.05               | 85.85  |
| H <sub>2</sub> O <sub>2</sub> *    | 2.13            | 1.48 | 2.03 | 1.92 | 64.66               | 87.94  |

Table S10. Activation barrier ( $\Delta E_a$ ) for each elementary step of H<sub>2</sub>O<sub>2</sub> formation and side actions on NiN<sub>2</sub>B<sub>2</sub>-h.

| Reaction Pathway                                                                | Activation Barriers ( $E_a$ , eV) |
|---------------------------------------------------------------------------------|-----------------------------------|
| O <sub>2</sub> * $\rightarrow$ 2O*                                              | 0.82                              |
| O <sub>2</sub> * + H* $\rightarrow$ OOH*                                        | 0.22                              |
| OOH* $\rightarrow$ O* + OH*                                                     | 1.13                              |
| OOH* + H* $\rightarrow$ O* + H <sub>2</sub> O                                   | 1.57                              |
| OOH* + H* $\rightarrow$ H <sub>2</sub> O <sub>2</sub> *                         | 0.45                              |
| H <sub>2</sub> O <sub>2</sub> * $\rightarrow$ 2OH*                              | 0.51                              |
| H <sub>2</sub> O <sub>2</sub> * $\rightarrow$ H <sub>2</sub> O <sub>2</sub> + * | 0.42                              |
| H <sub>2</sub> O <sub>2</sub> * + H* $\rightarrow$ OH* + H <sub>2</sub> O       | 2.34                              |

|                                 |      |
|---------------------------------|------|
| $O^* + H^* \rightarrow OH^*$    | 0.73 |
| $OH^* + H^* \rightarrow H_2O^*$ | 2.44 |
| $H_2O^* \rightarrow H_2O + *$   | 0.31 |

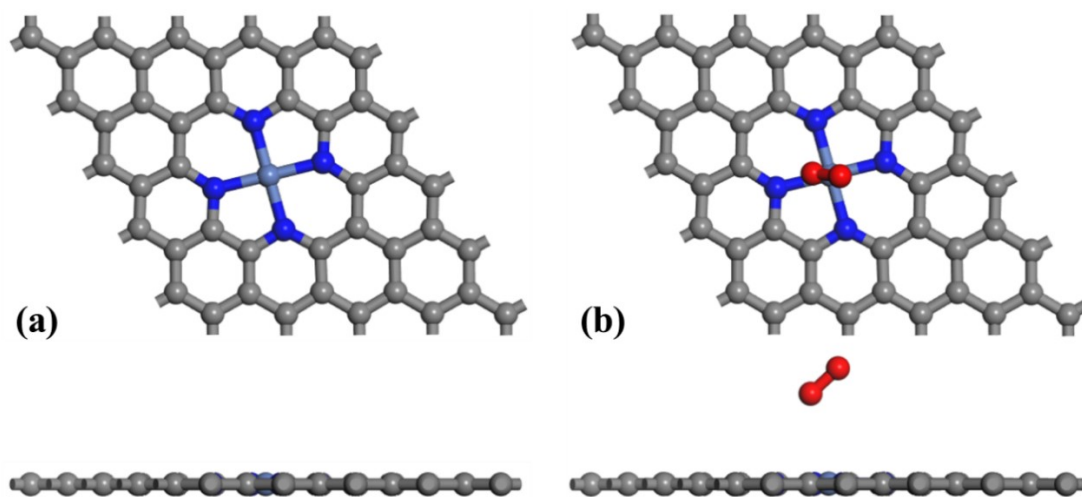

Fig. S5 Optimized structures of NiN<sub>4</sub> and O<sub>2</sub> adsorption on NiN<sub>4</sub>.

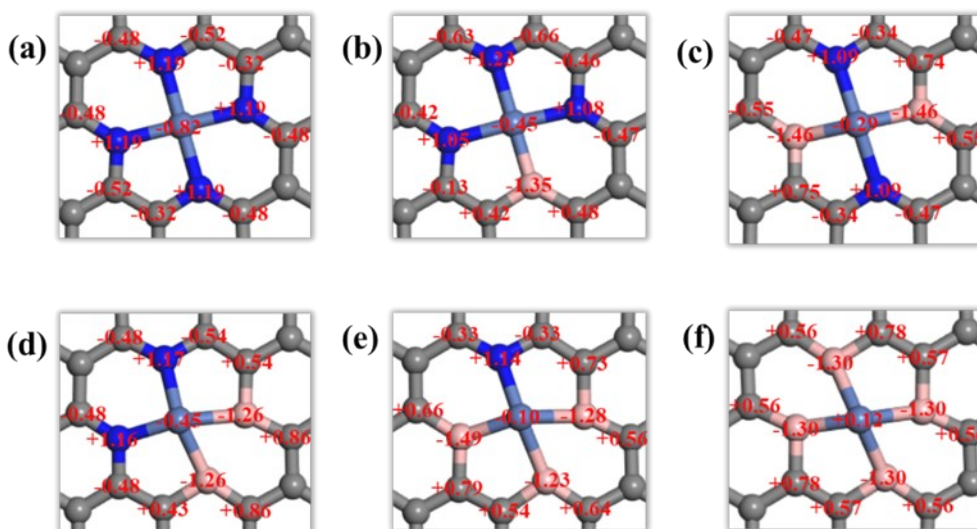

Fig. S6 Bader charge analysis of NiN<sub>4</sub> and NiN<sub>x</sub>B<sub>y</sub>. The “+” and “-” represent gaining and losing electrons, respectively.

Table S11. Bader charge analysis of Ni atoms and O atoms connected with Ni in O<sub>2</sub><sup>\*</sup>, OOH<sup>\*</sup> species on NiN<sub>x</sub>B<sub>y</sub> and NiN<sub>4</sub>. The “+” and “-” represent gaining and losing electrons, respectively.

| Catalyst | Q (Ni, e) | Q (O <sub>2</sub> , e) | Q (OOH, e) | $E_{ads}$ (O <sub>2</sub> , eV) |
|----------|-----------|------------------------|------------|---------------------------------|
|----------|-----------|------------------------|------------|---------------------------------|

|                                    |       |       |       |       |
|------------------------------------|-------|-------|-------|-------|
| NiN <sub>3</sub> B                 | -0.45 | +0.36 | +0.4  | -0.45 |
| NiN <sub>2</sub> B <sub>2</sub> -h | -0.45 | +0.39 | +0.39 | -0.91 |
| NiN <sub>2</sub> B <sub>2</sub> -o | -0.29 | +0.38 | +0.46 | -0.67 |
| NiNB <sub>3</sub>                  | -0.1  | +0.38 | +0.45 | -0.71 |
| NiB <sub>4</sub>                   | +0.12 | +0.40 | +0.34 | -0.91 |
| NiN <sub>4</sub>                   | -0.82 |       |       |       |

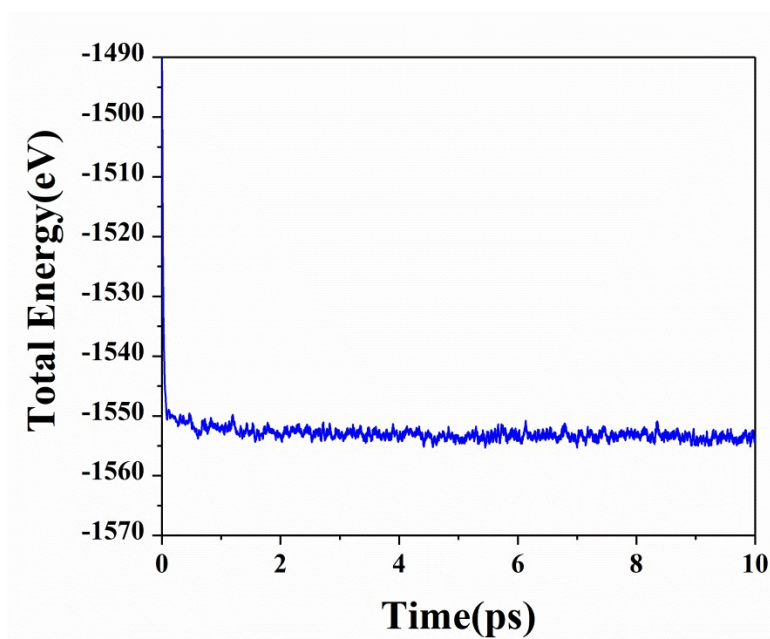

Fig. S7 The total energy change of NiN<sub>2</sub>B<sub>2</sub>-h under 0.5M H<sub>2</sub>SO<sub>4</sub> solution after 10 ps AIMD simulation at 298.15 K.

Table S12. Bond lengths for O<sub>2</sub><sup>\*</sup>, OOH<sup>\*</sup> and H<sub>2</sub>O<sub>2</sub><sup>\*</sup> on the NiN<sub>2</sub>B<sub>2</sub>-h in gas and SO<sub>4</sub><sup>2-</sup>

anion solution, respectively. The Ni-O represents the O atoms bonded with Ni.

| Adsorbates               | Bond length in gas |         | Bond length in $\text{SO}_4^{2-}$<br>anion solution |         | $E_{\text{ads}}$ (eV) |          |
|--------------------------|--------------------|---------|-----------------------------------------------------|---------|-----------------------|----------|
|                          | Ni-O (Å)           | O-O (Å) | Ni-O (Å)                                            | O-O (Å) | gas                   | solution |
| $\text{O}_2^*$           | 1.75               | 1.28    | 1.91                                                | 1.31    | -0.91                 | -0.88    |
| $\text{OOH}^*$           | 1.79               | 1.44    | 1.88                                                | 1.43    | -1.61                 | -1.61    |
| $\text{H}_2\text{O}_2^*$ | 2.13               | 1.48    | 2.10                                                | 1.46    | -0.57                 | -1.20    |

Table S13. Activation barrier ( $\Delta E_a$ ) for each elementary step of  $\text{H}_2\text{O}_2$  formation and side actions on  $\text{NiN}_2\text{B}_2\text{-h}$  under  $\text{SO}_4^{2-}$  anion solution.

| Reaction Pathway                                                                   | Activation Barriers(eV) |
|------------------------------------------------------------------------------------|-------------------------|
| $\text{O}_2^* \rightarrow 2\text{O}^*$                                             | 2.60                    |
| $\text{O}_2^* + \text{HSO}_4^- \rightarrow \text{OOH}^* + \text{SO}_4^{2-}$        | 0.57                    |
| $\text{OOH}^* \rightarrow \text{O}^* + \text{OH}^*$                                | 1.39                    |
| $\text{OOH}^* + \text{H}^* \rightarrow \text{O}^* + \text{H}_2\text{O}$            | 1.06                    |
| $\text{OOH}^* + \text{H}^* \rightarrow \text{H}_2\text{O}_2^*$                     | 0.15                    |
| $\text{H}_2\text{O}_2^* \rightarrow 2\text{OH}^*$                                  | 1.28                    |
| $\text{H}_2\text{O}_2^* \rightarrow \text{H}_2\text{O}_2 + ^*$                     | 0.63                    |
| $\text{H}_2\text{O}_2^* + \text{H}^* \rightarrow \text{OH}^* + \text{H}_2\text{O}$ | 3.00                    |

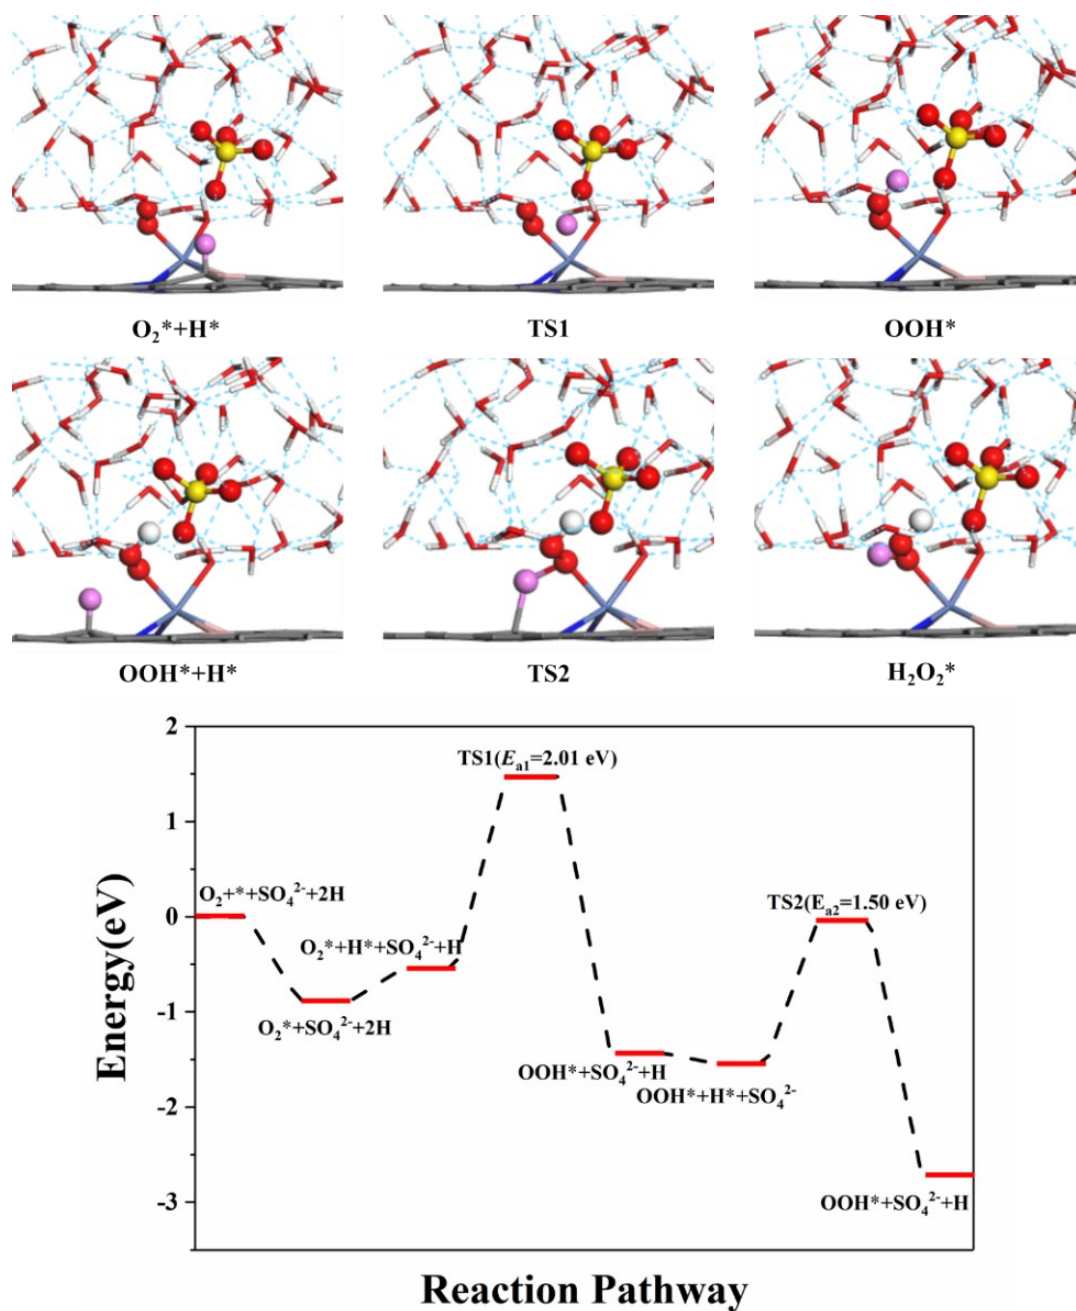

Fig. S8 Energy and profile of optimized structures for the O<sub>2</sub> hydrogenation to H<sub>2</sub>O<sub>2</sub>\* on NiN<sub>2</sub>B<sub>2</sub>-h under SO<sub>4</sub><sup>2-</sup> anion solution. The H atoms are gained from support directly. Color code: C, brown; Ni, navyblue; O, red; N, blue; B, pink; S, yellow; H, white; transferred H, magenta.



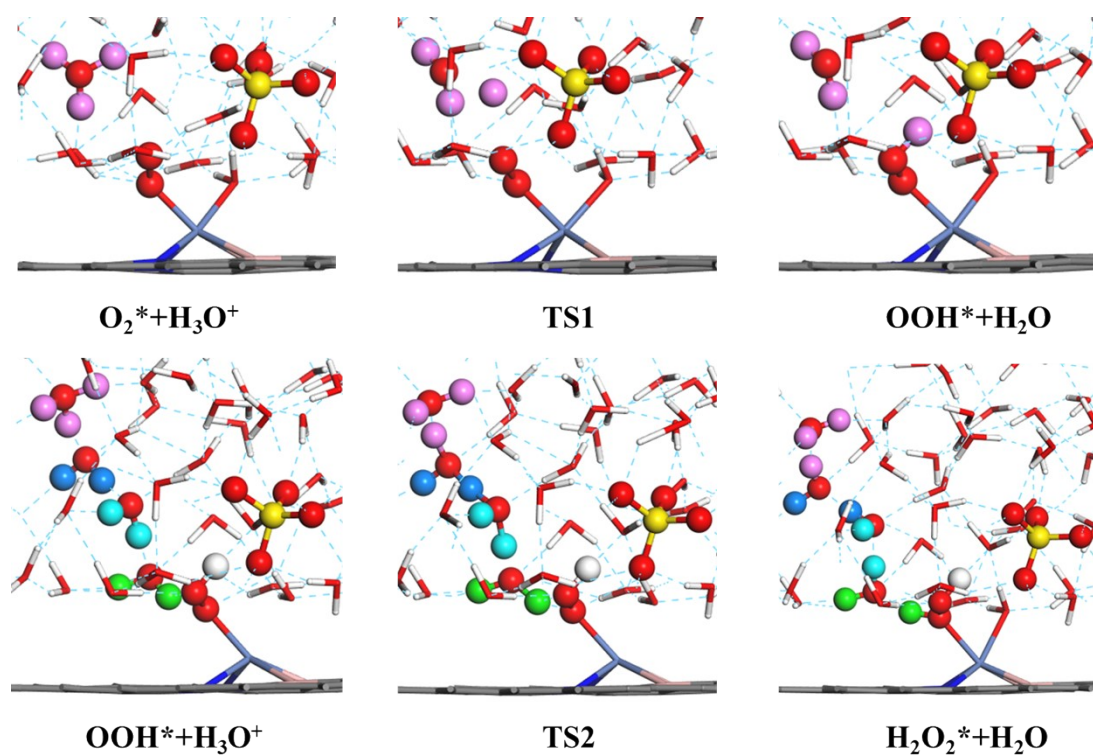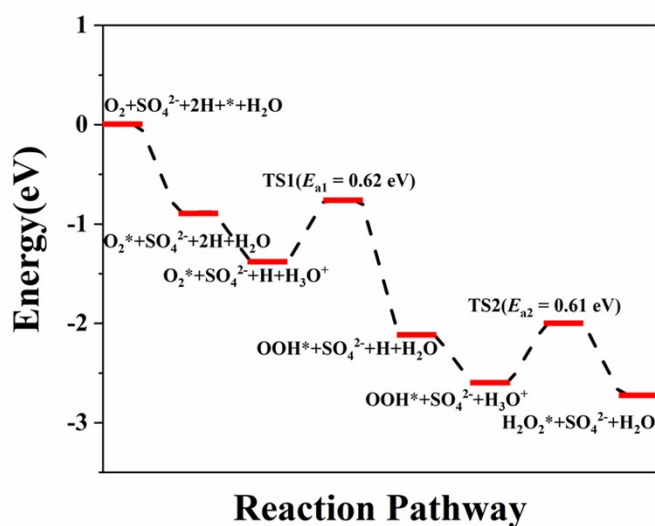

Fig. S9 Energy and profile of optimized structures for the  $\text{O}_2$  hydrogenation to  $\text{H}_2\text{O}_2^*$  on  $\text{NiN}_2\text{B}_2\text{-h}$  under  $\text{SO}_4^{2-}$  anion solution. The H atoms are gained from  $\text{H}_3\text{O}^+$ . Color code: C, brown; Ni, navyblue; O, red; N, blue; B, pink; S, yellow; H, white; transferred H, magenta, dodger blue, cyan and green.
